# Supplementary material for: Synthesis of selenated tetracyclic indoloazulenesviaiodine and diorganyl diselenides
Source: Royal Society of Chemistry journal article supplement (doi:10.1039/d1ob00268f), 2021-01-01

## Supporting Information

### Synthesis of Selenated Tetracyclic Indoloazulenes *via* Iodine and Diorganyl Diselenides

Khin Myat Noe Win,<sup>a</sup> Amol D. Sonawane<sup>a</sup> and Mamoru Koketsu<sup>\*,a</sup>

<sup>a</sup>Department of Chemistry and Biomolecular Science, Faculty of Engineering, Gifu University, Gifu 501-1193 Japan.

#### List of the Content:

|                                                           |      |
|-----------------------------------------------------------|------|
| <sup>1</sup> H NMR and <sup>13</sup> C NMR Spectra copies | 2-45 |
|-----------------------------------------------------------|------|

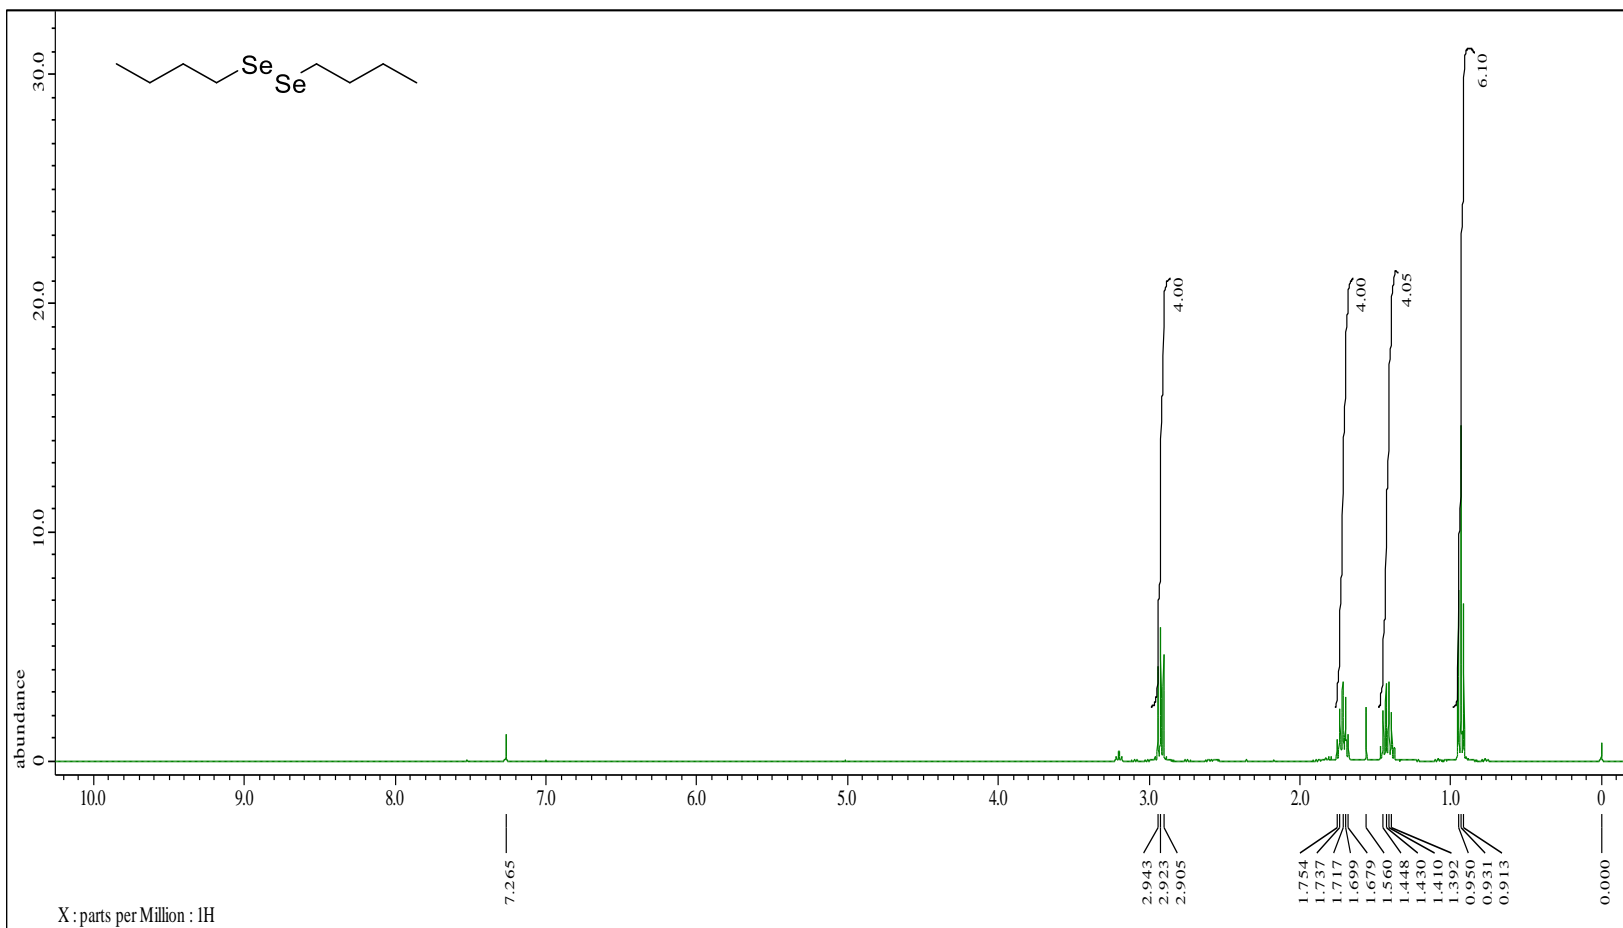

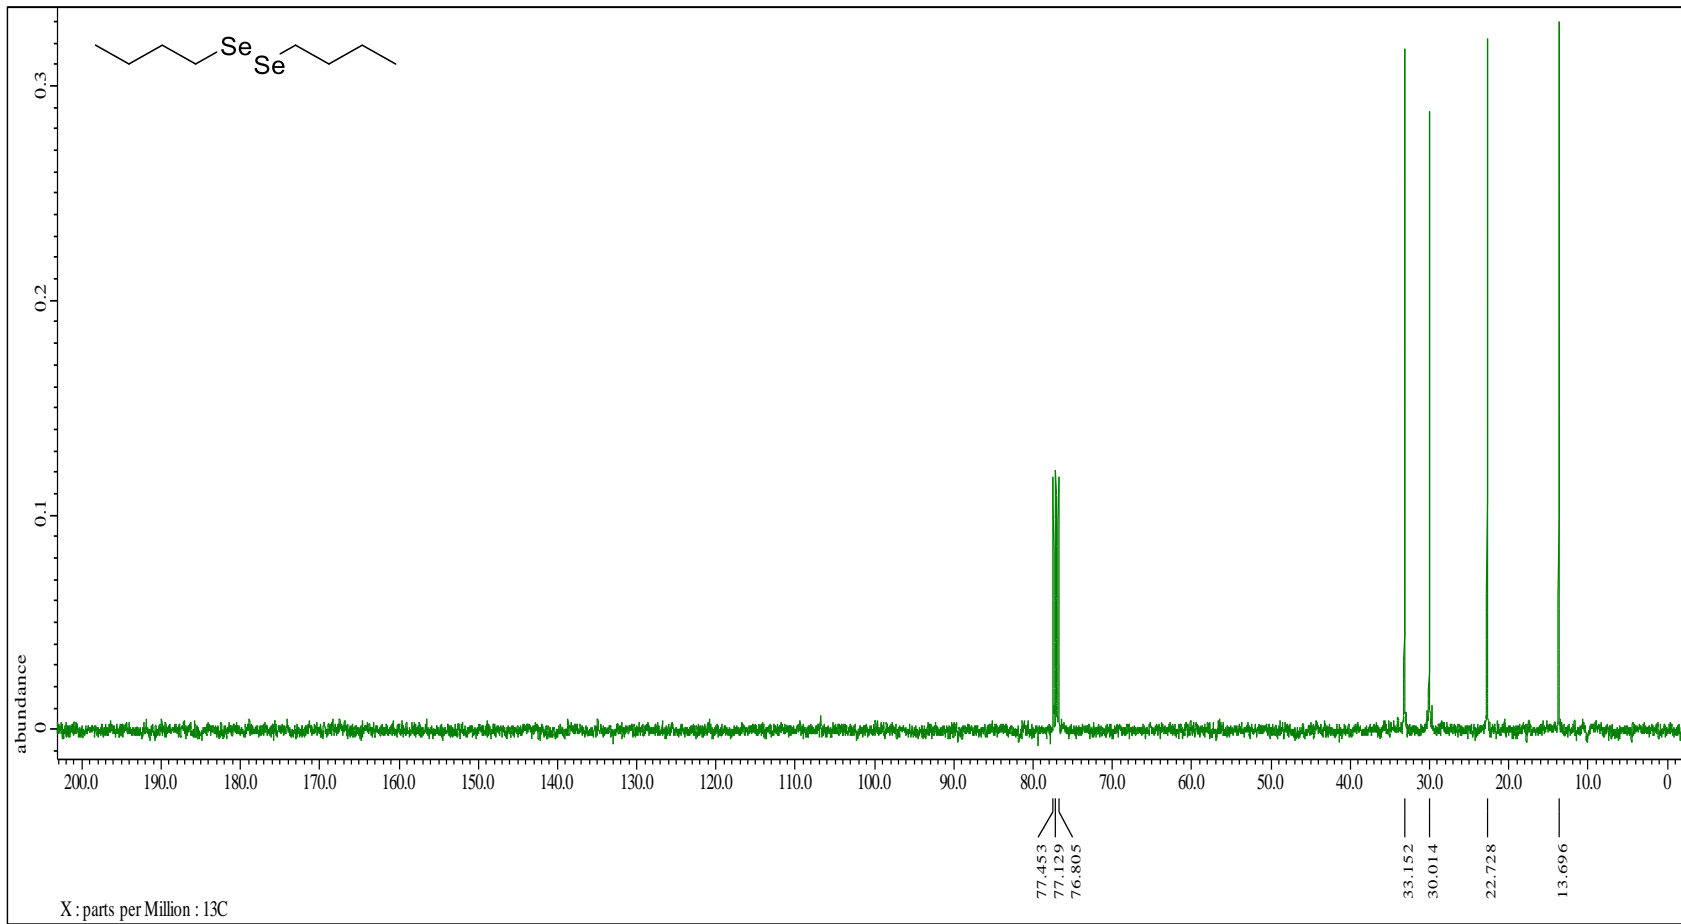

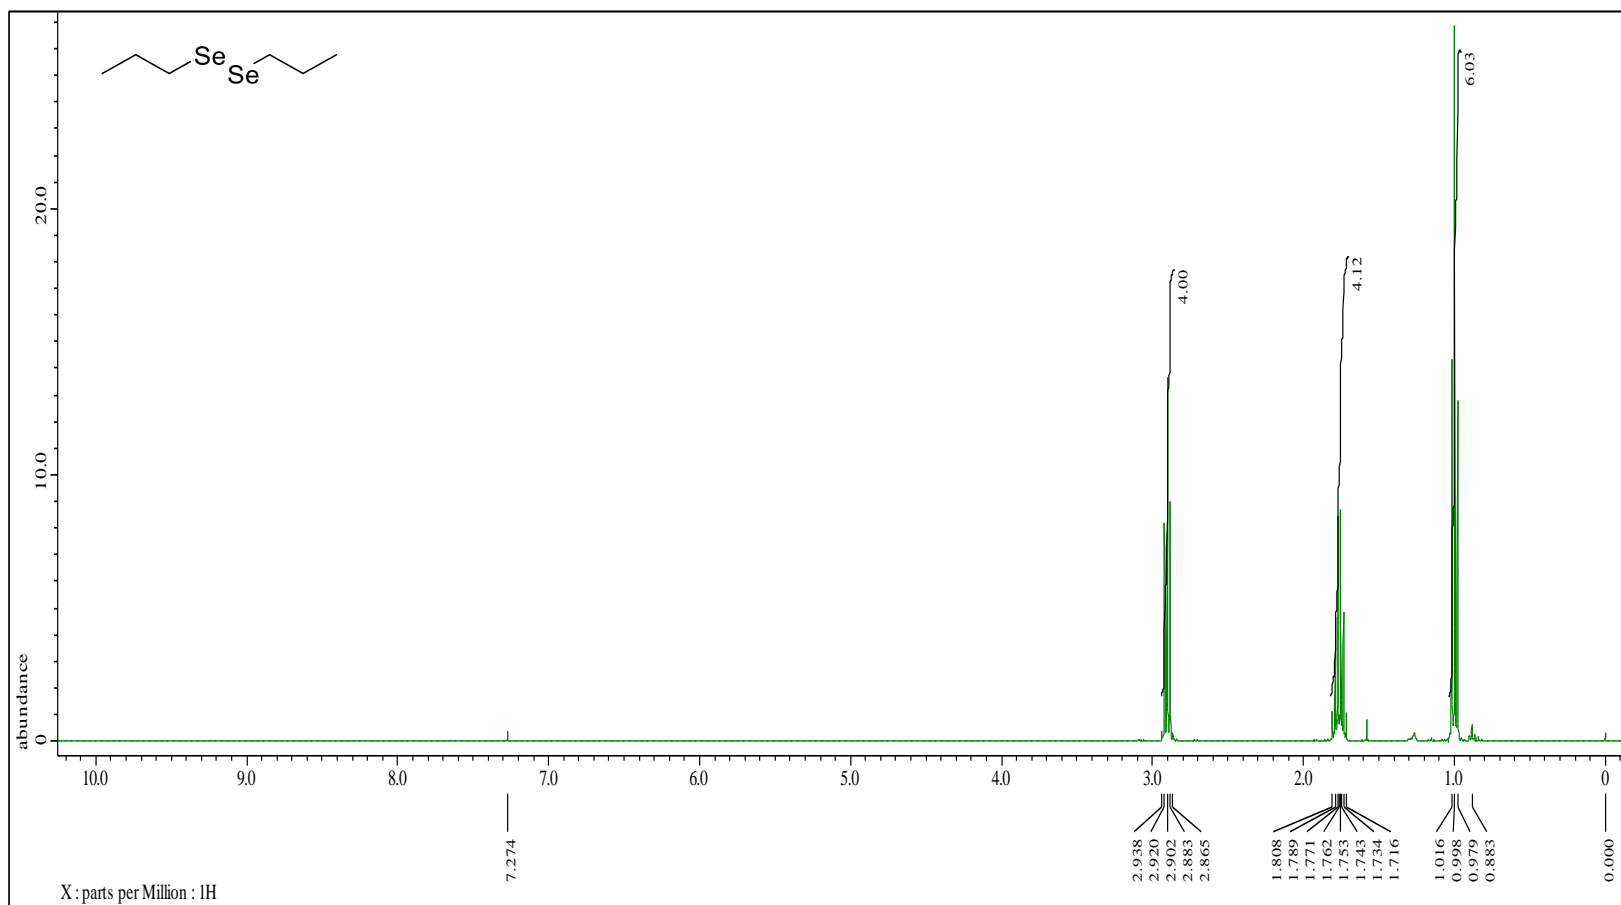

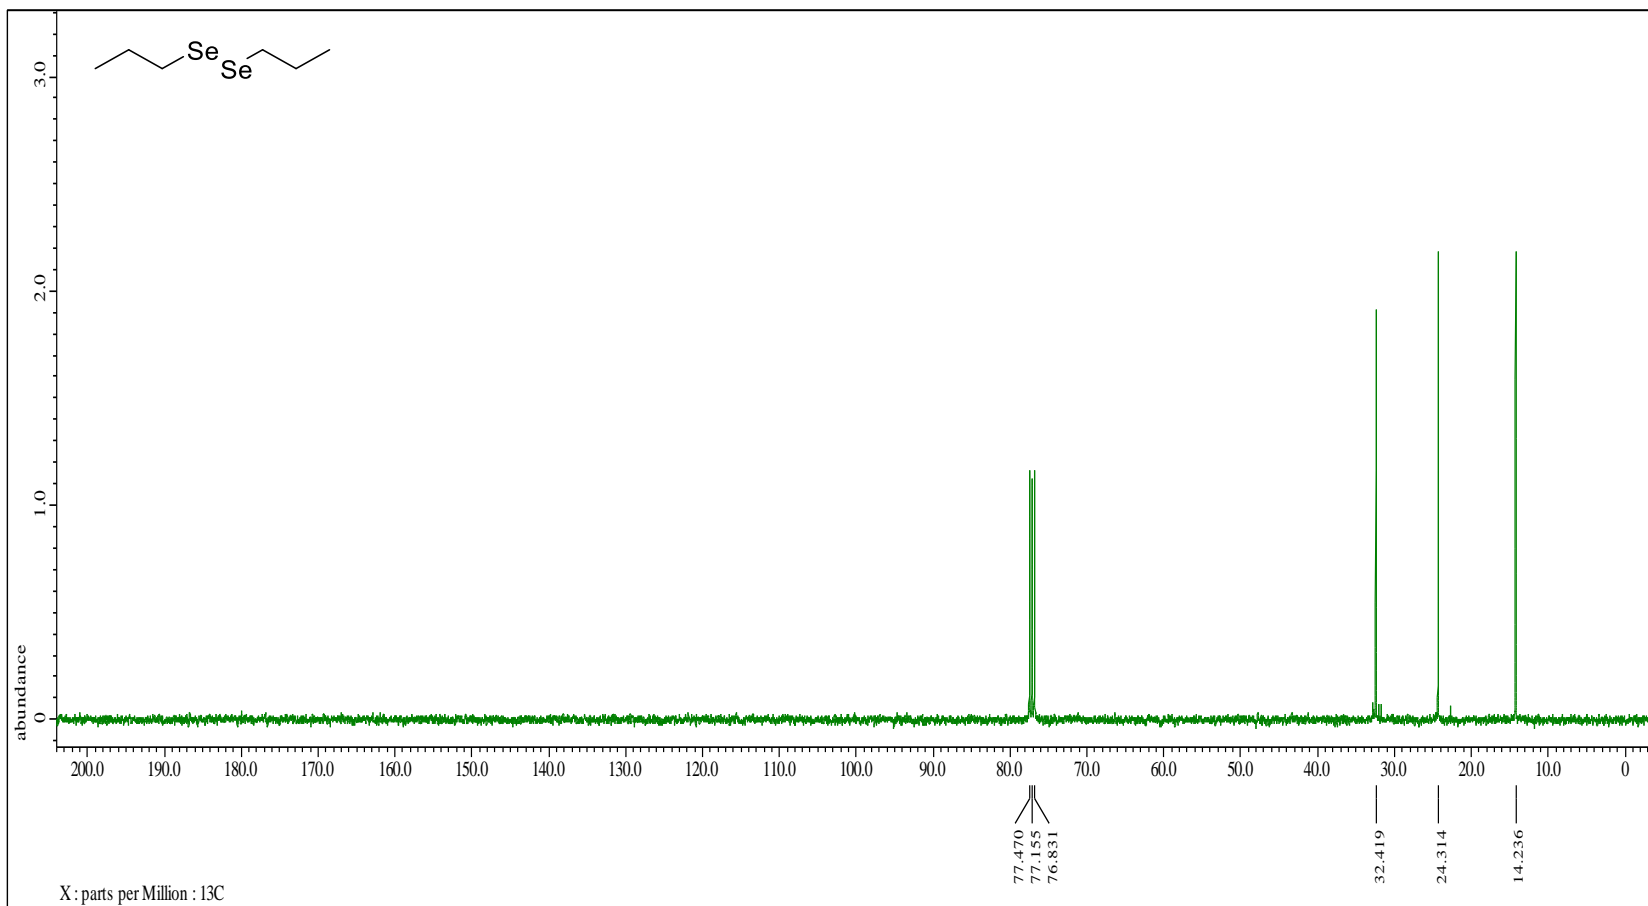

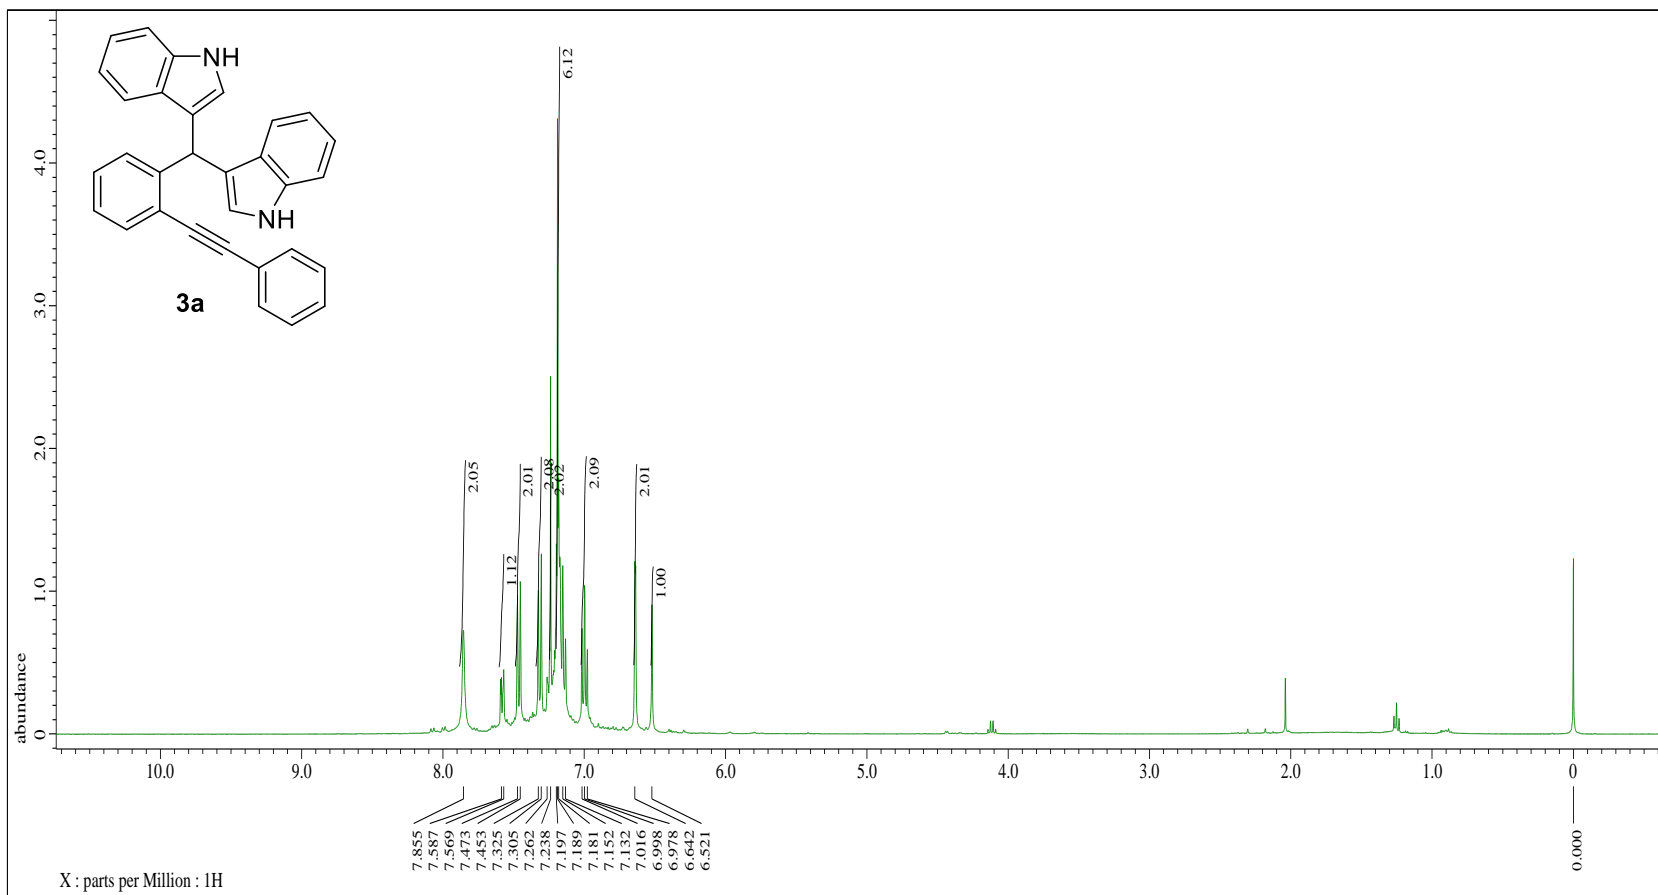

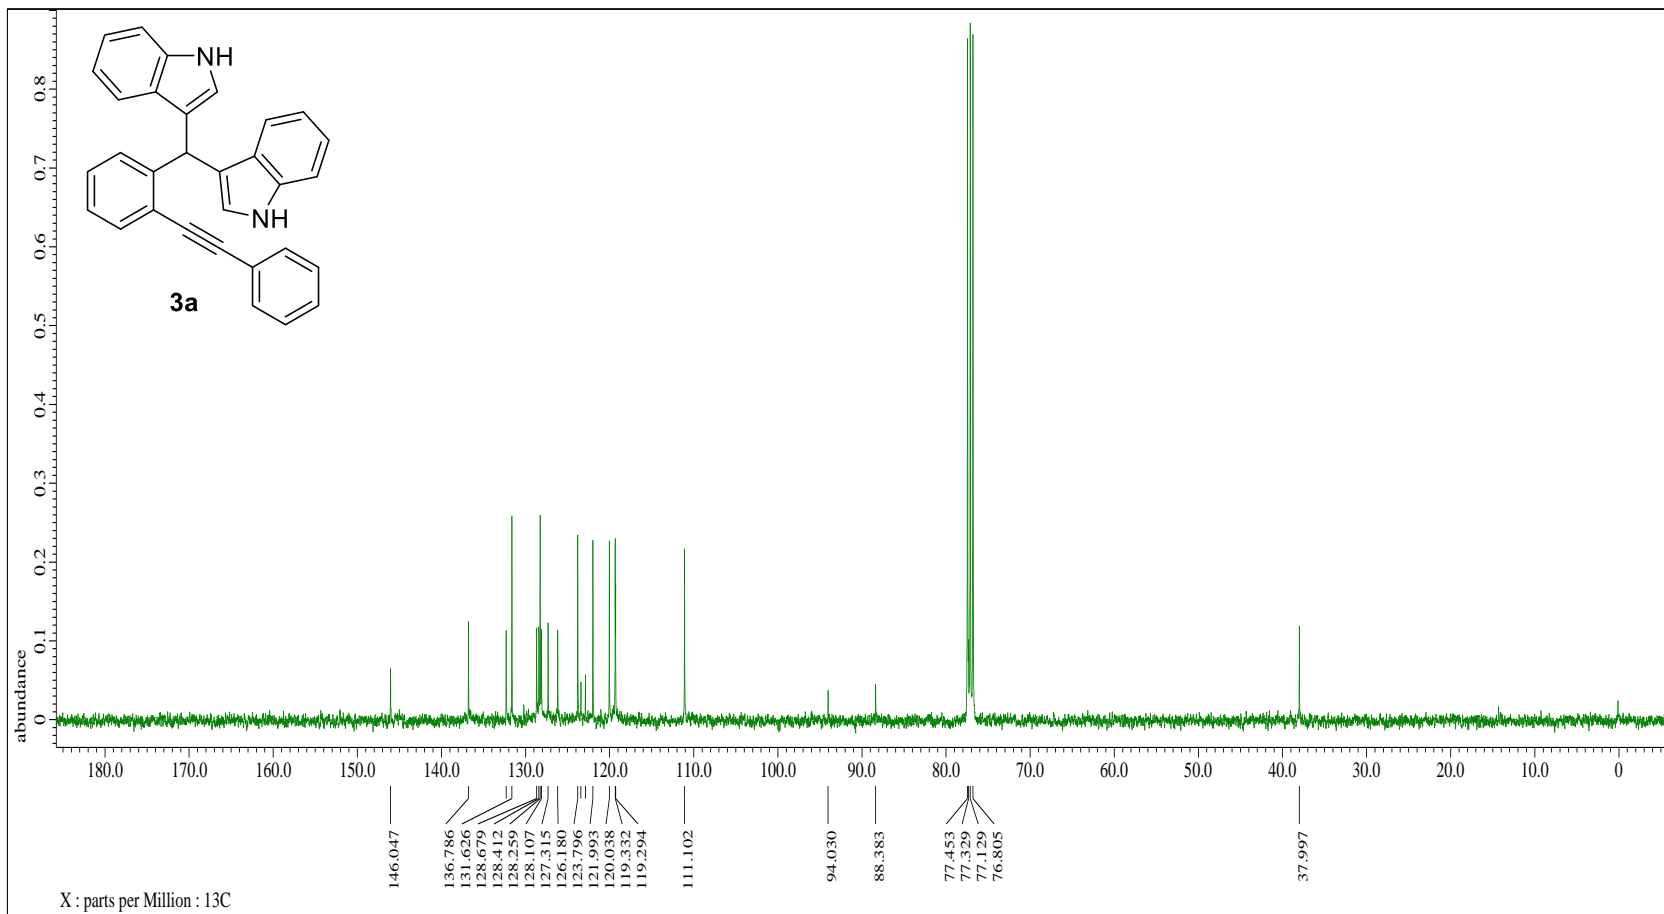

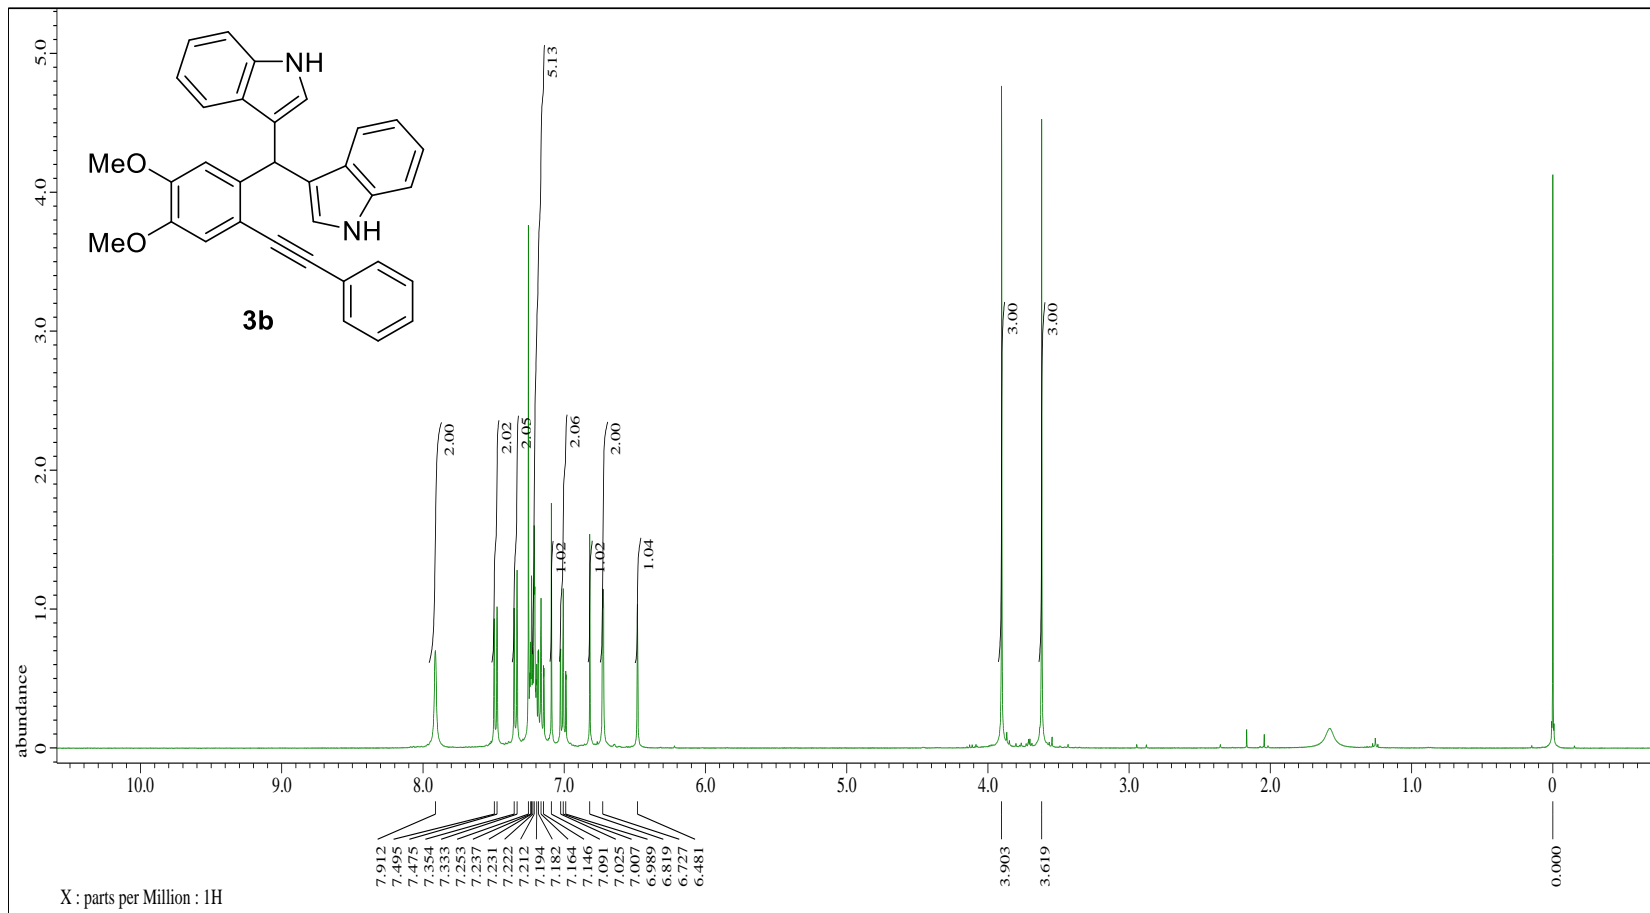



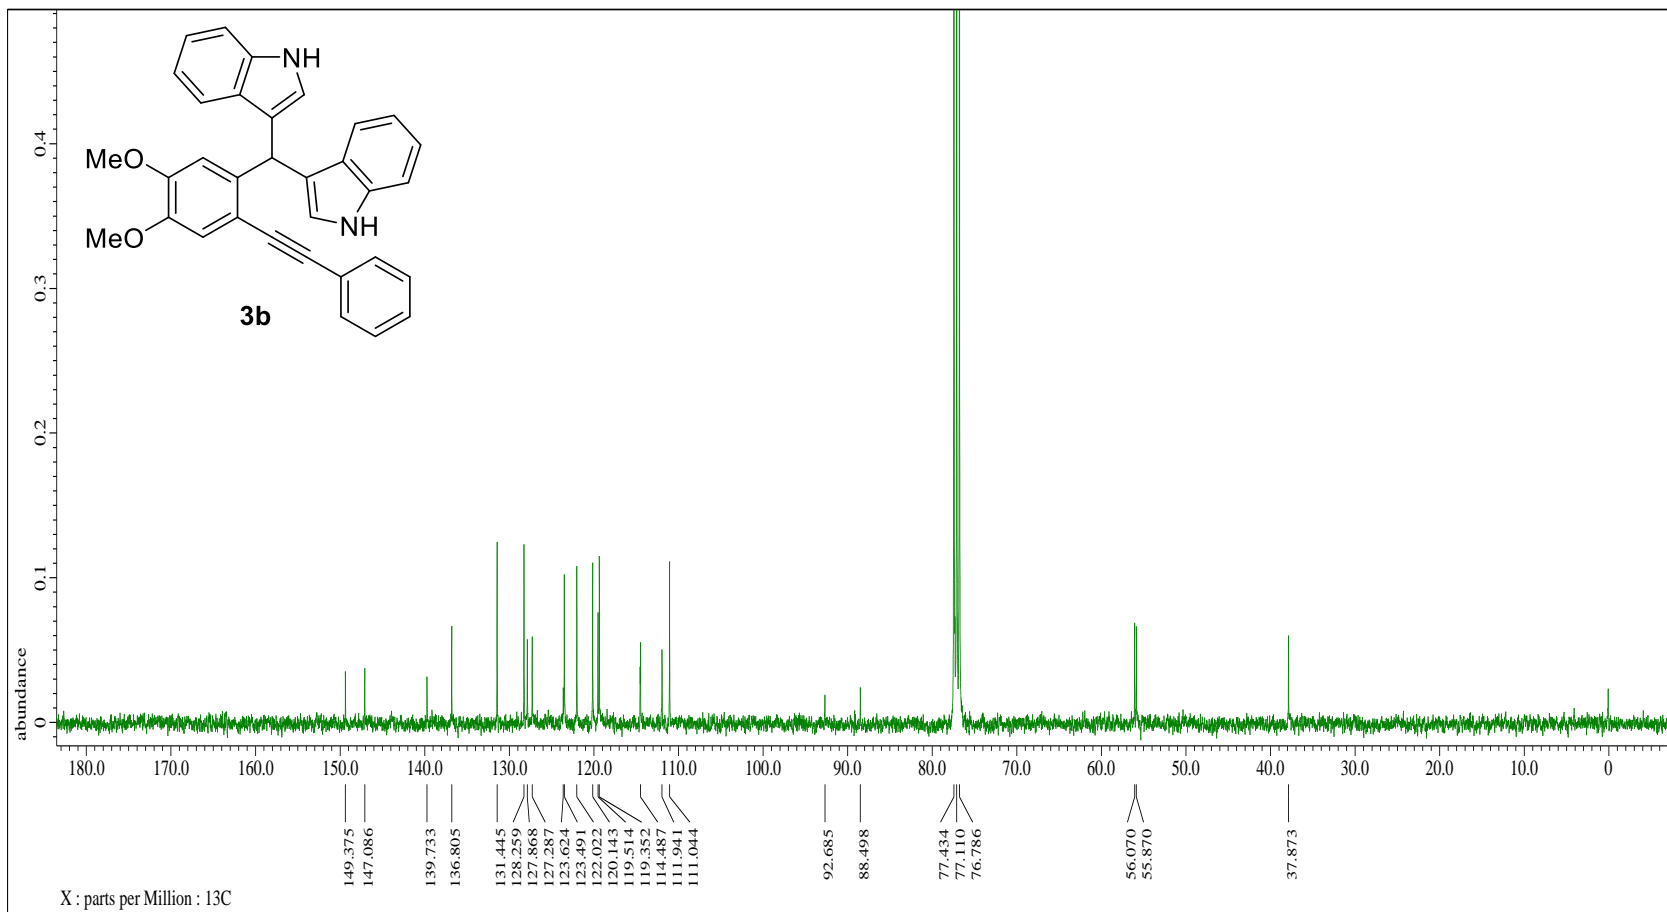

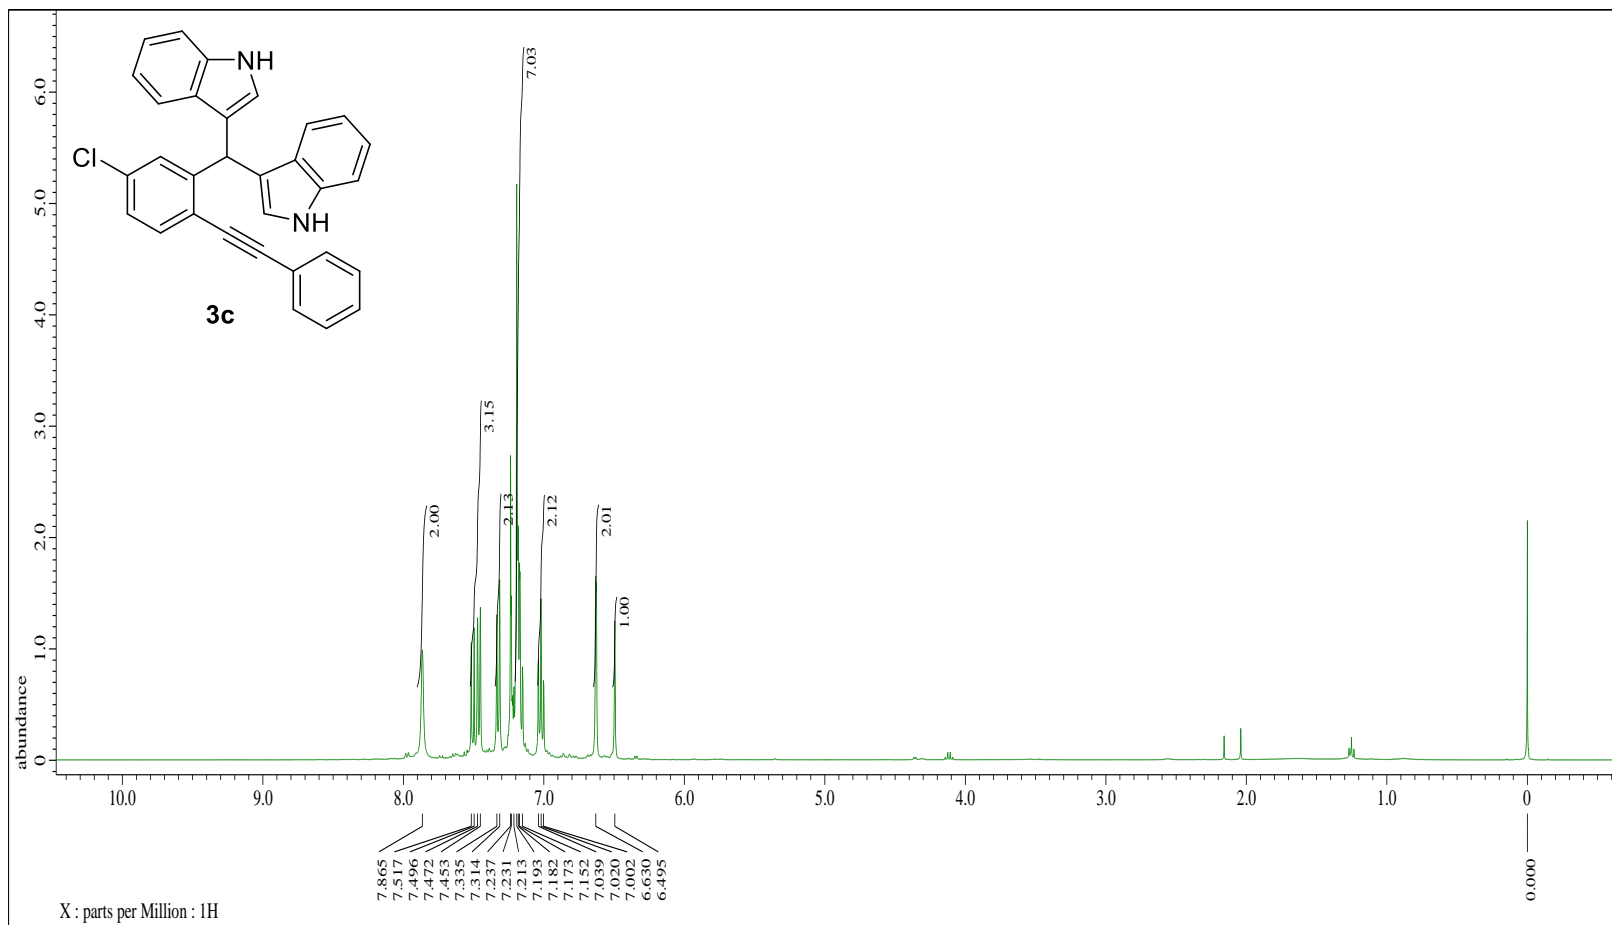

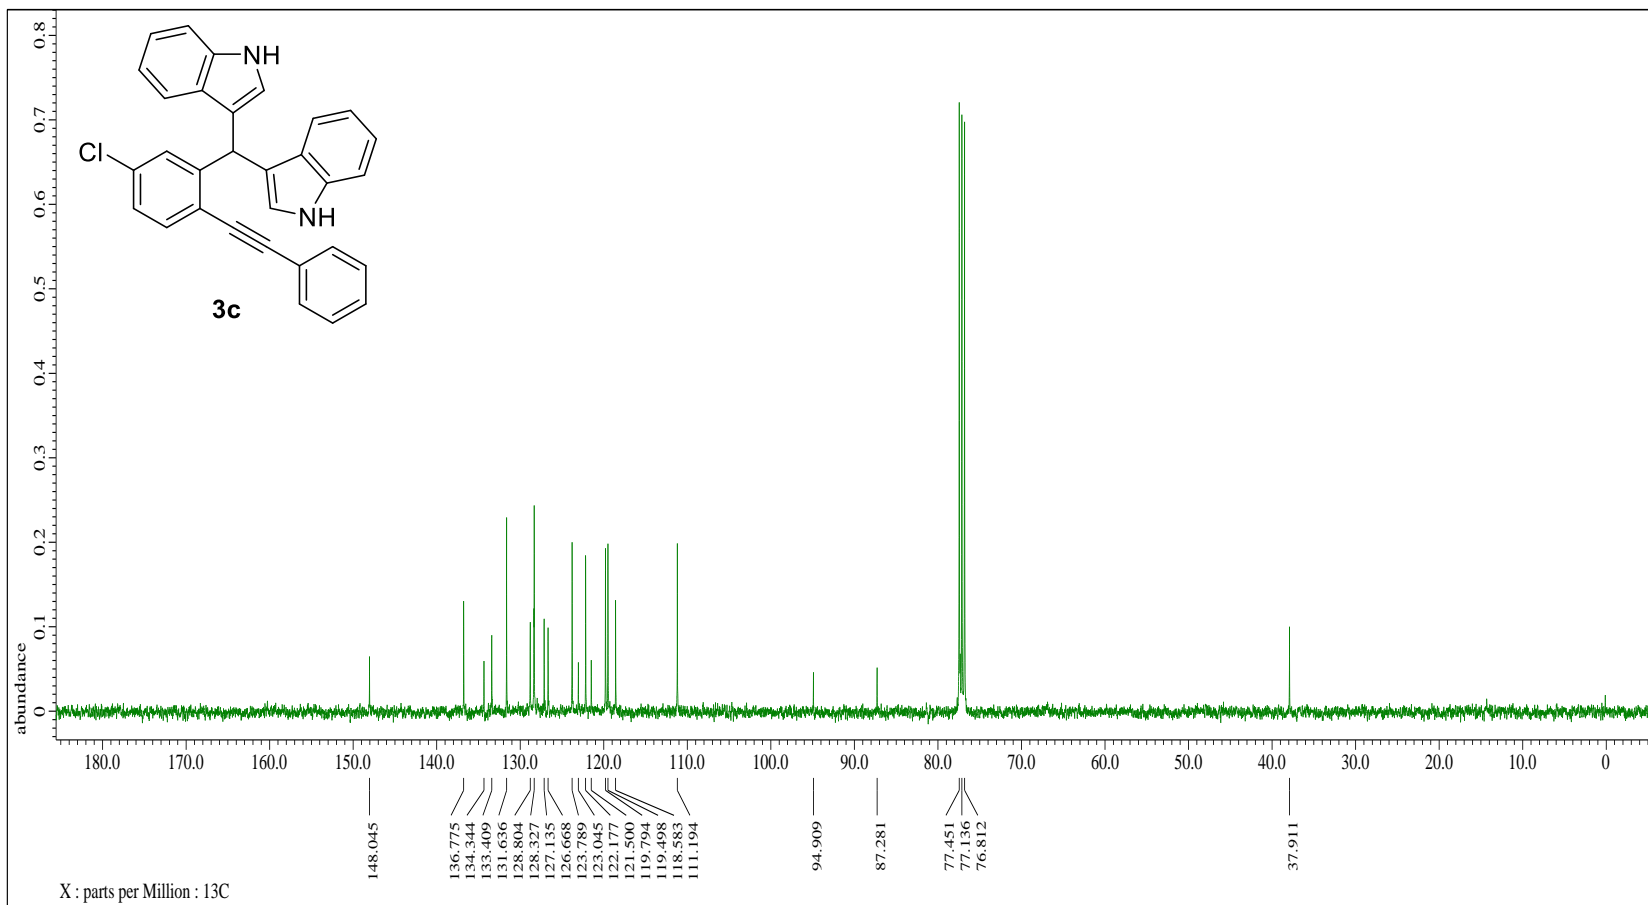

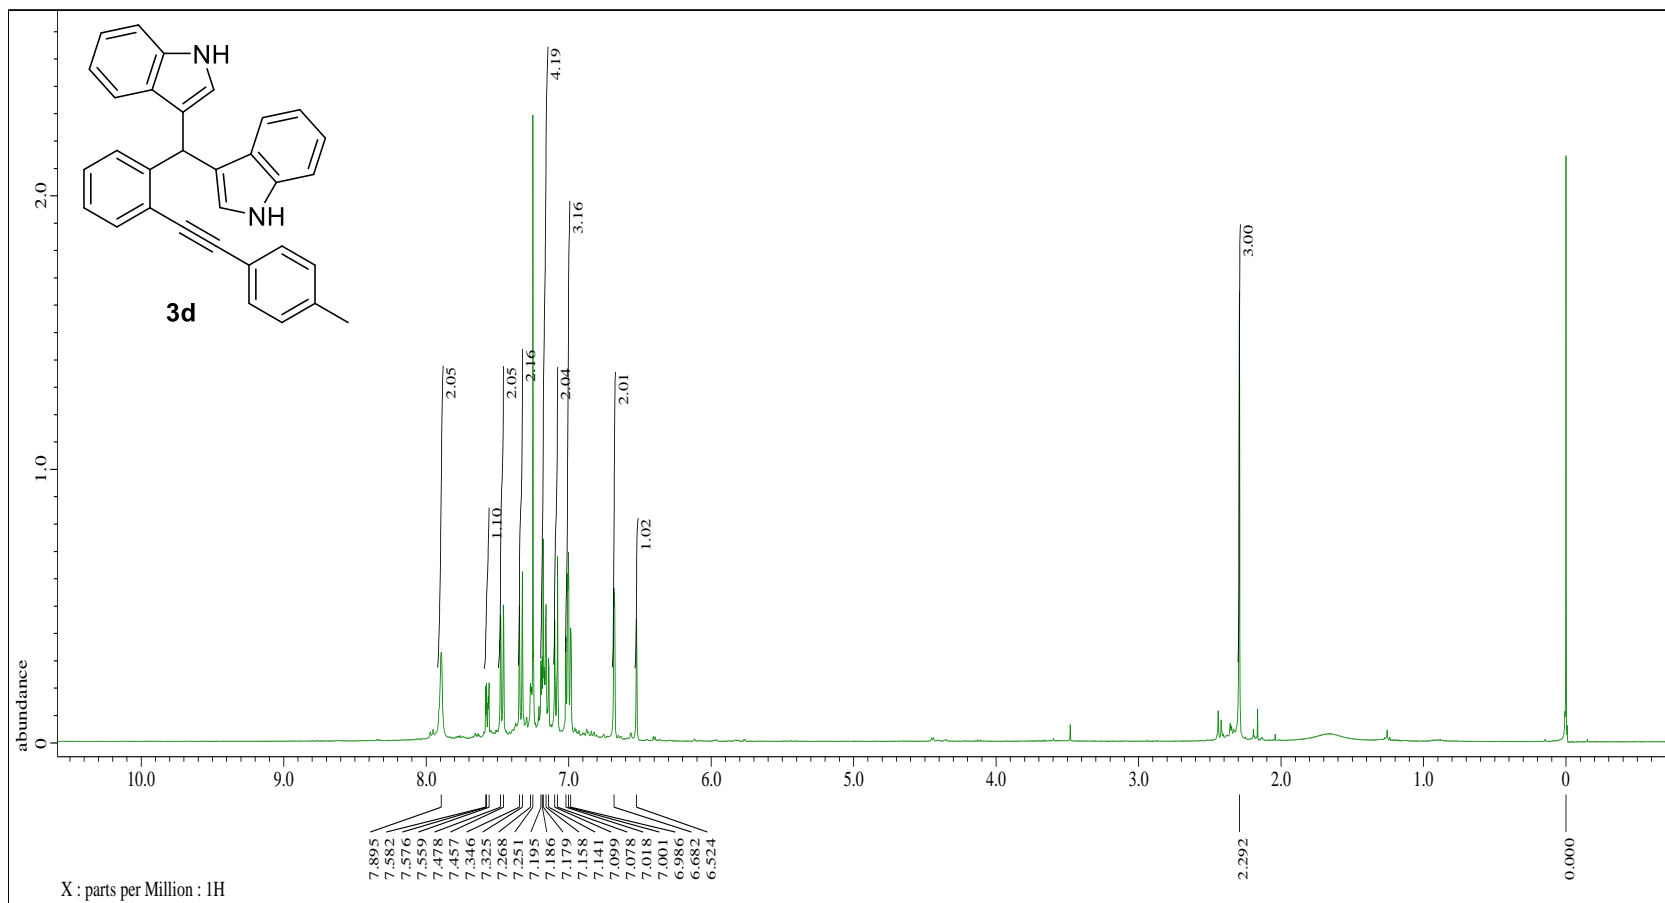

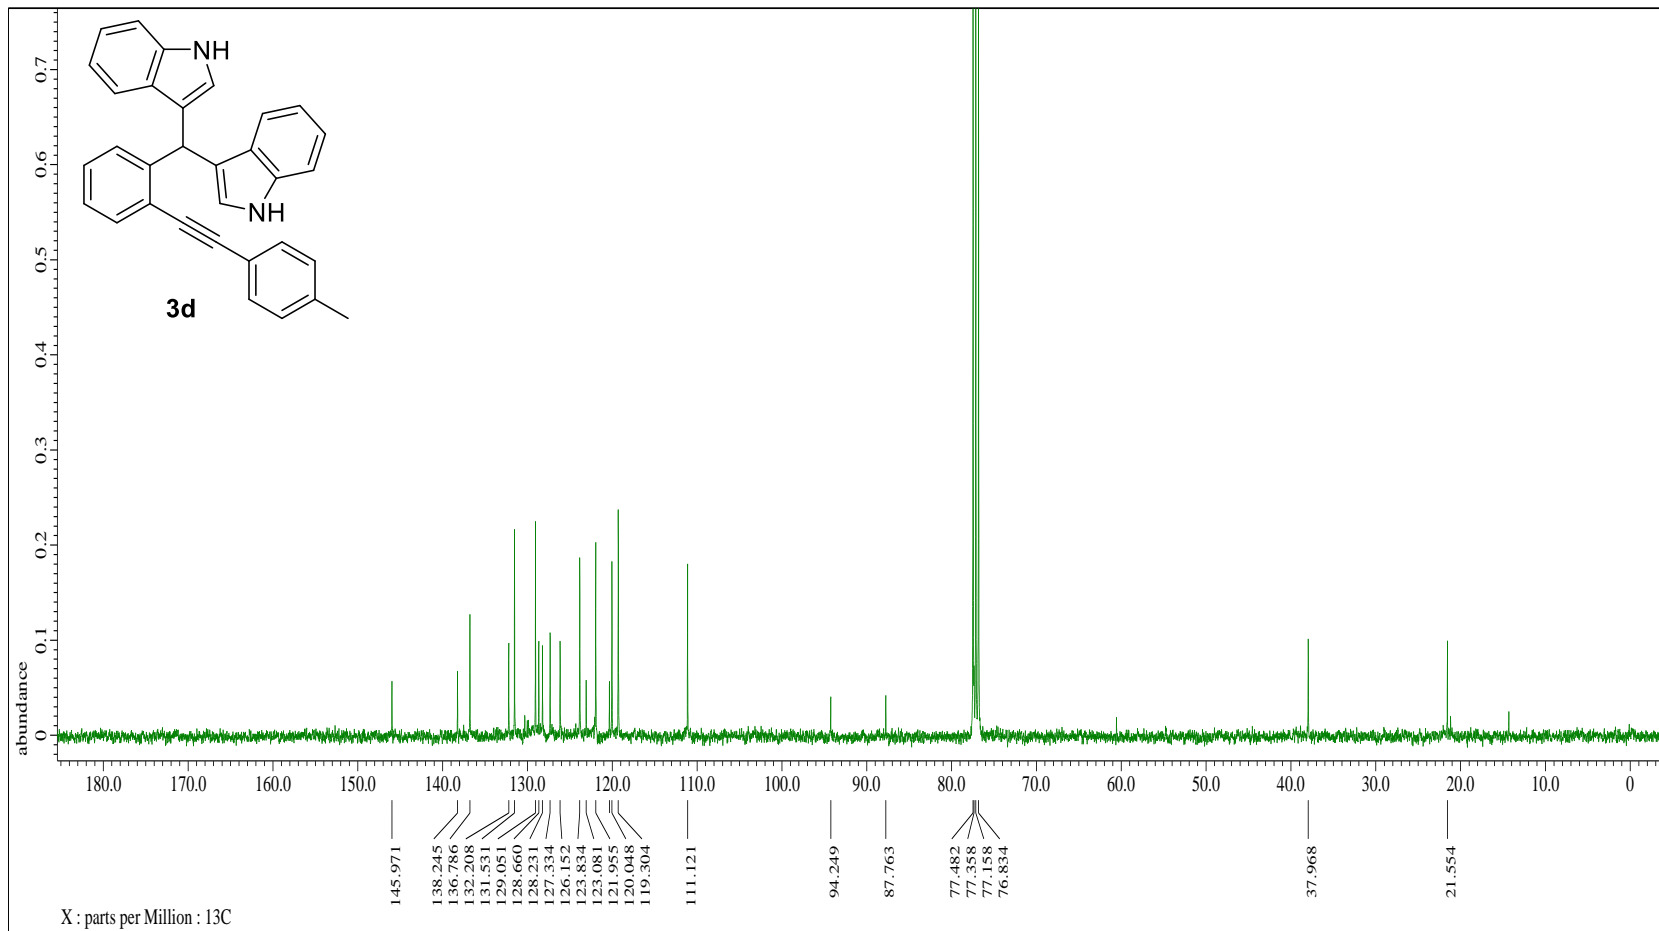

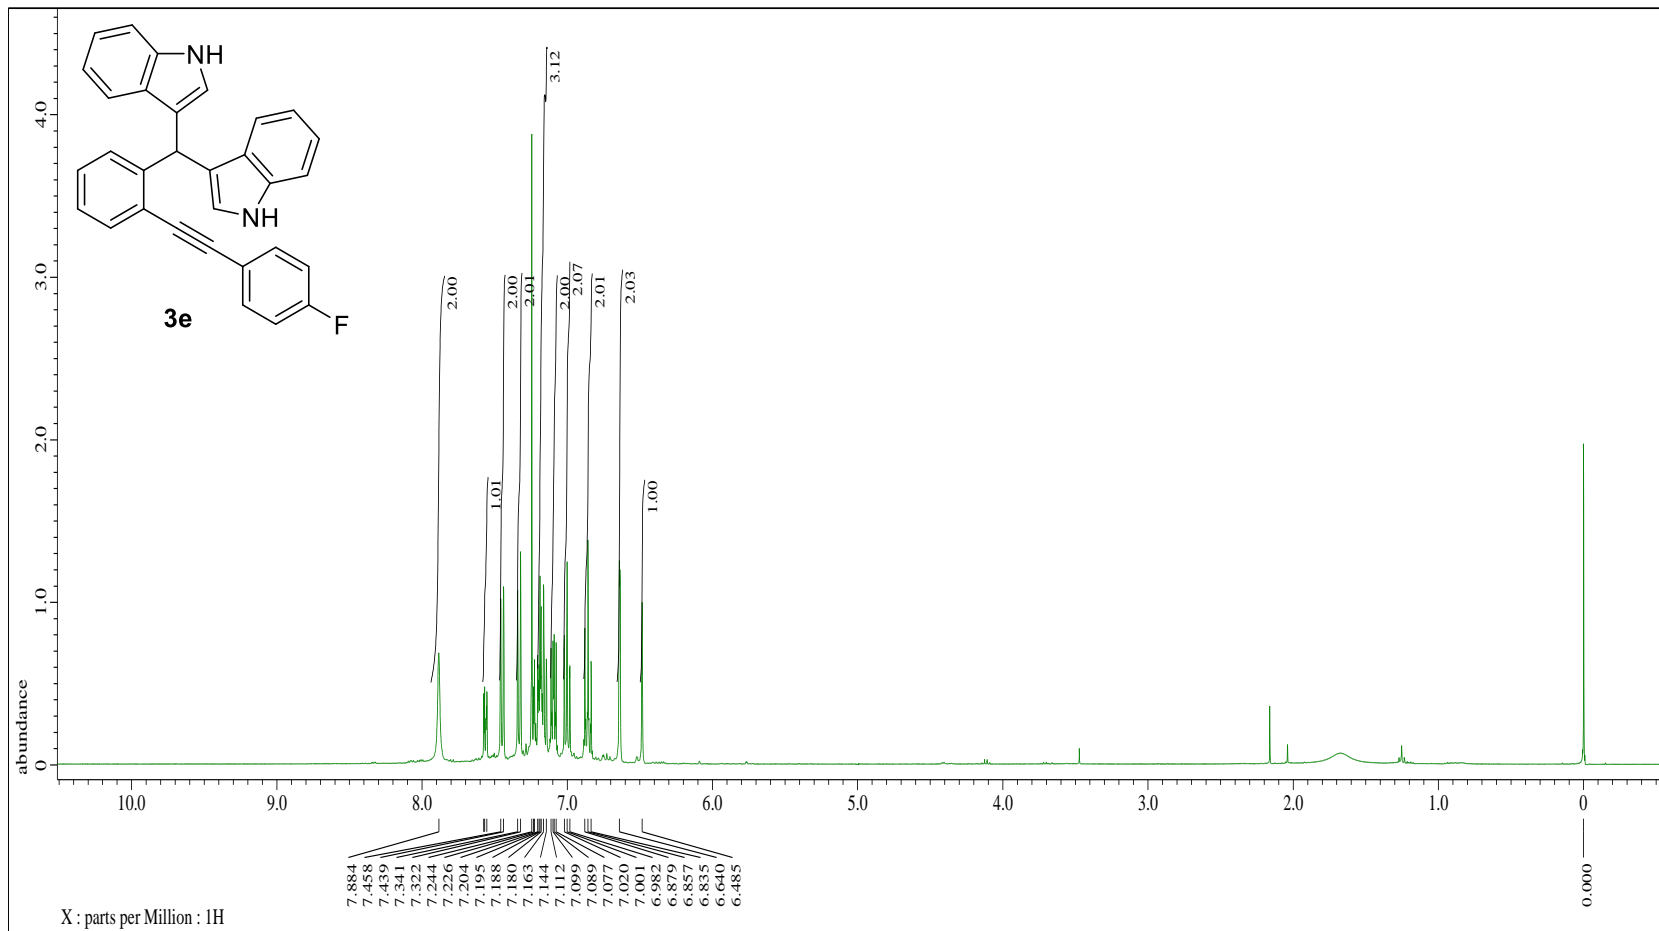

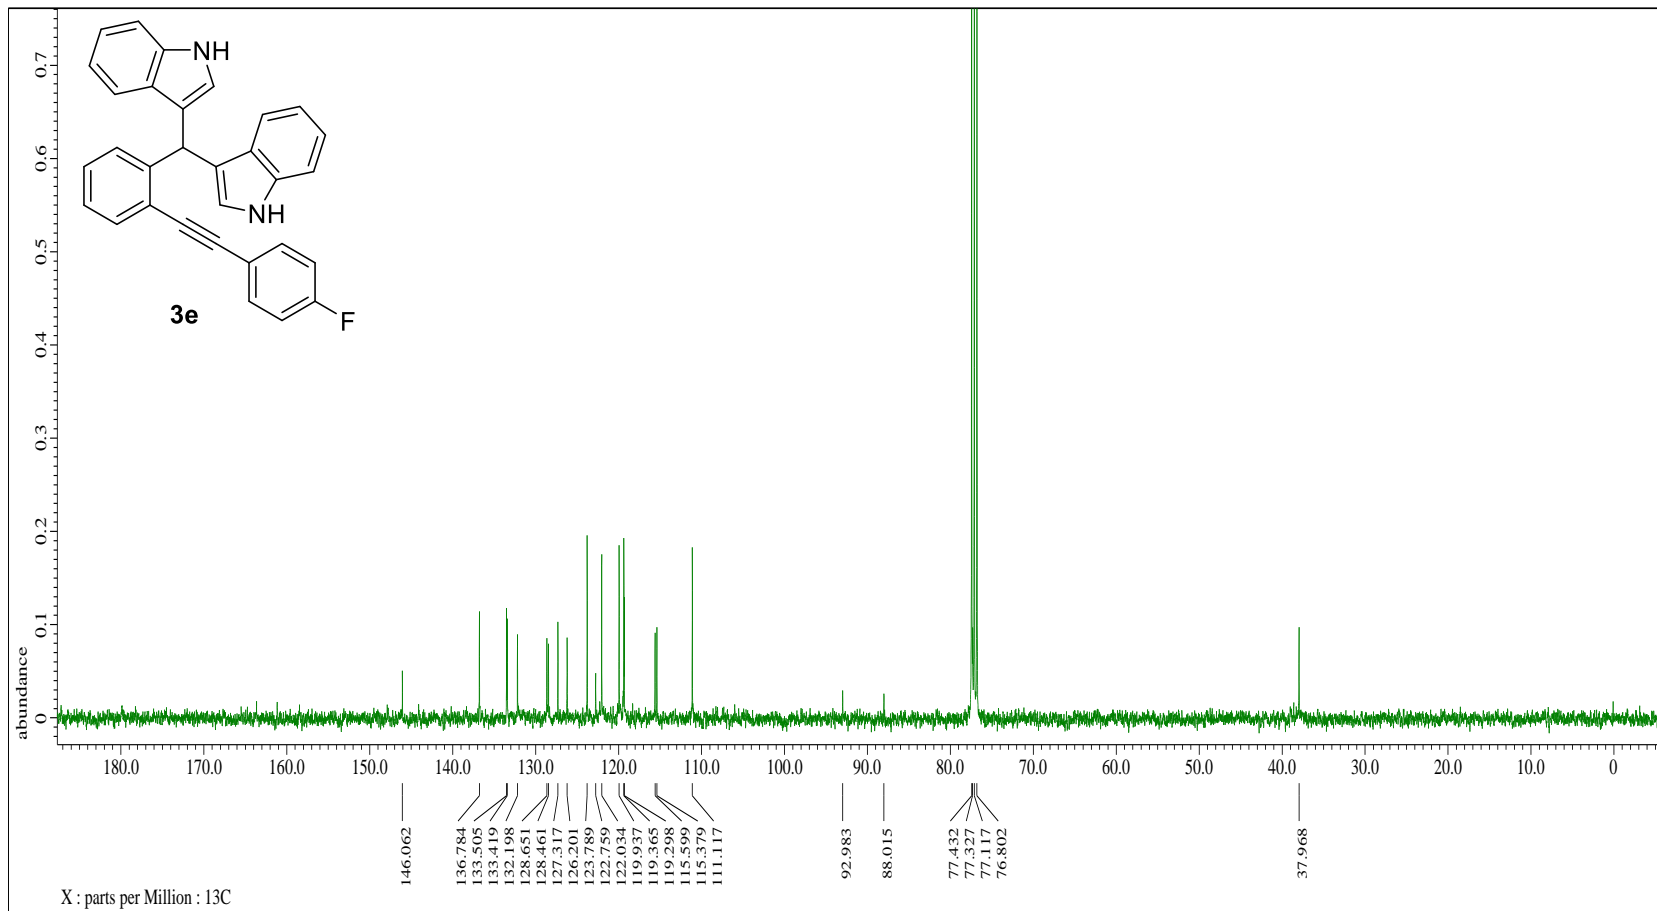

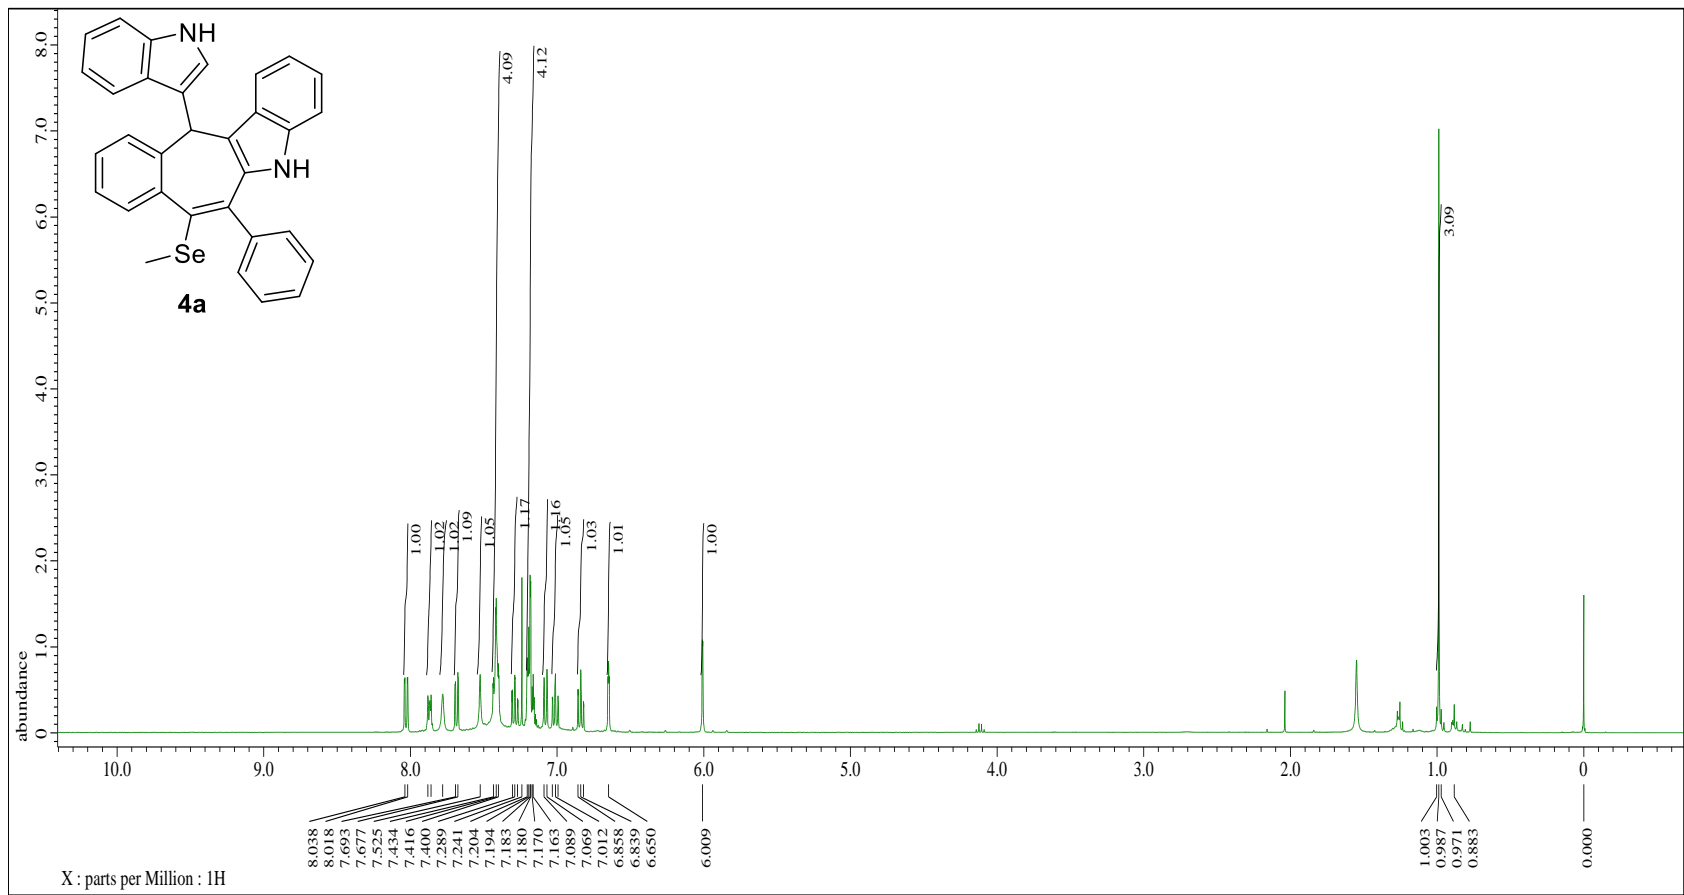



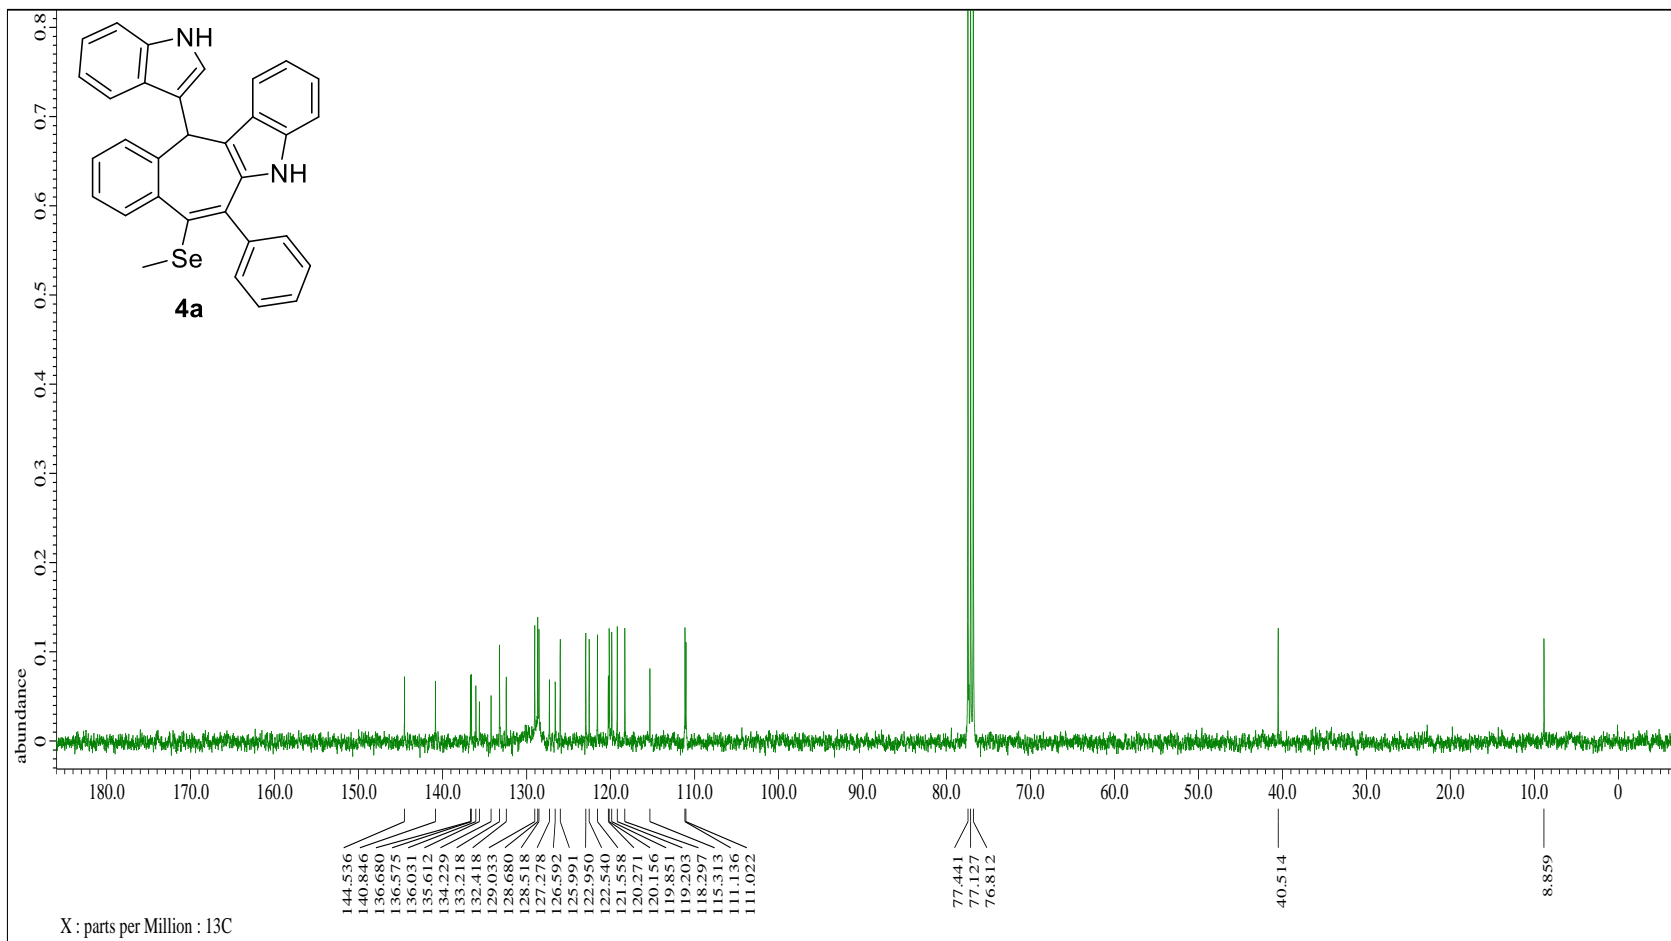

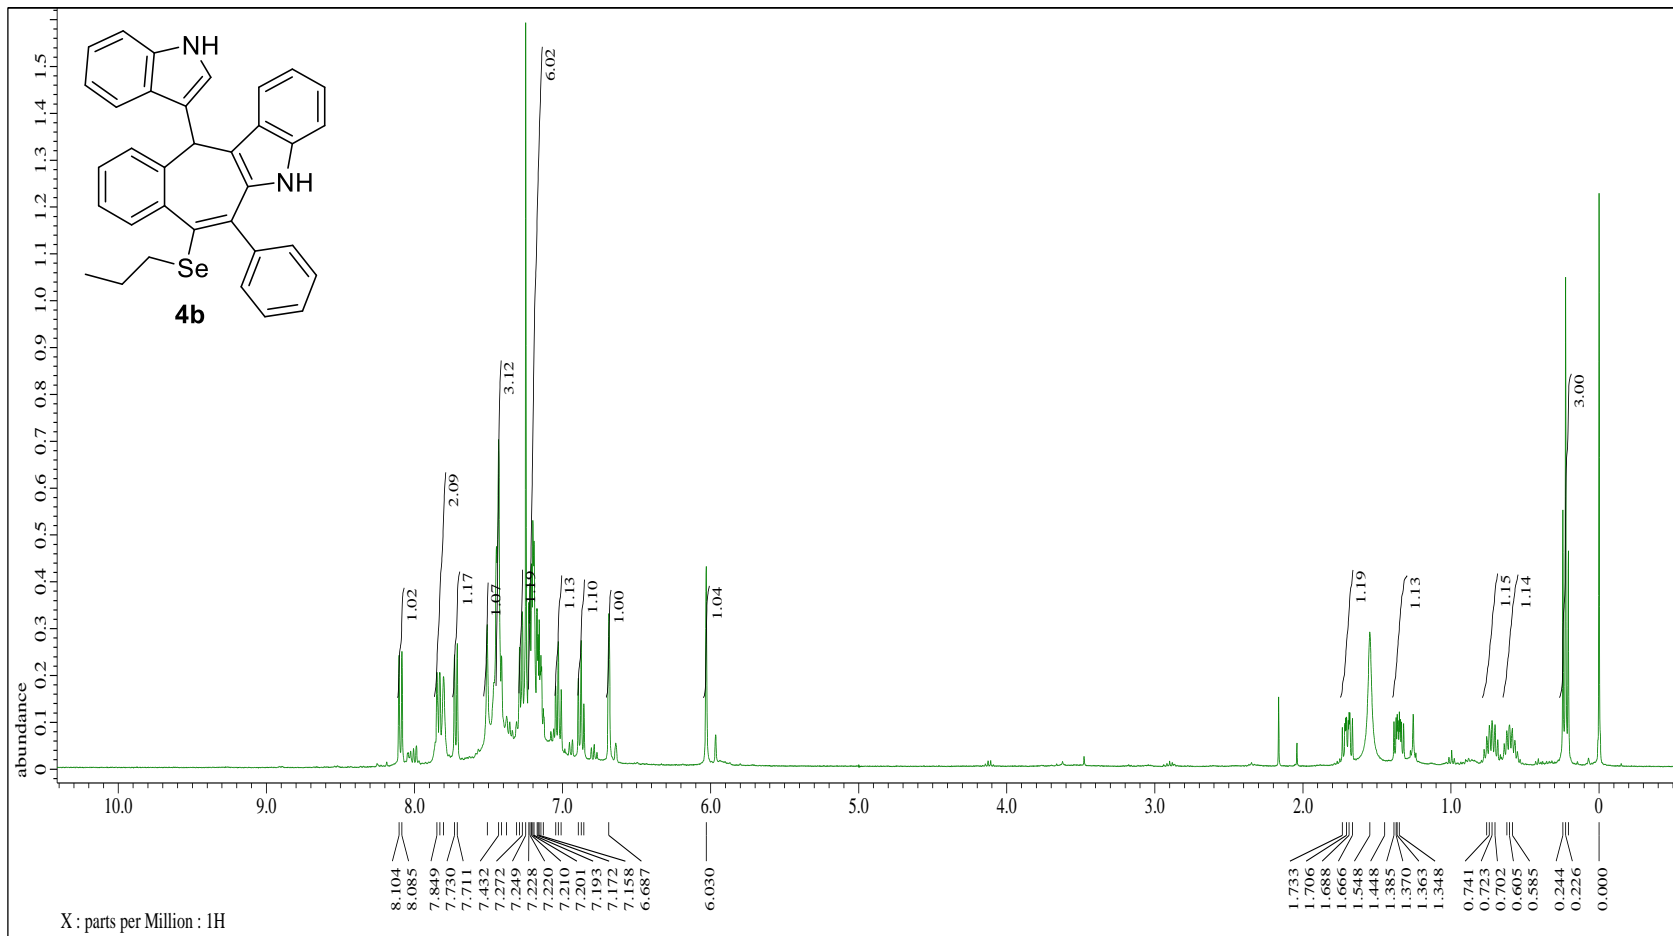

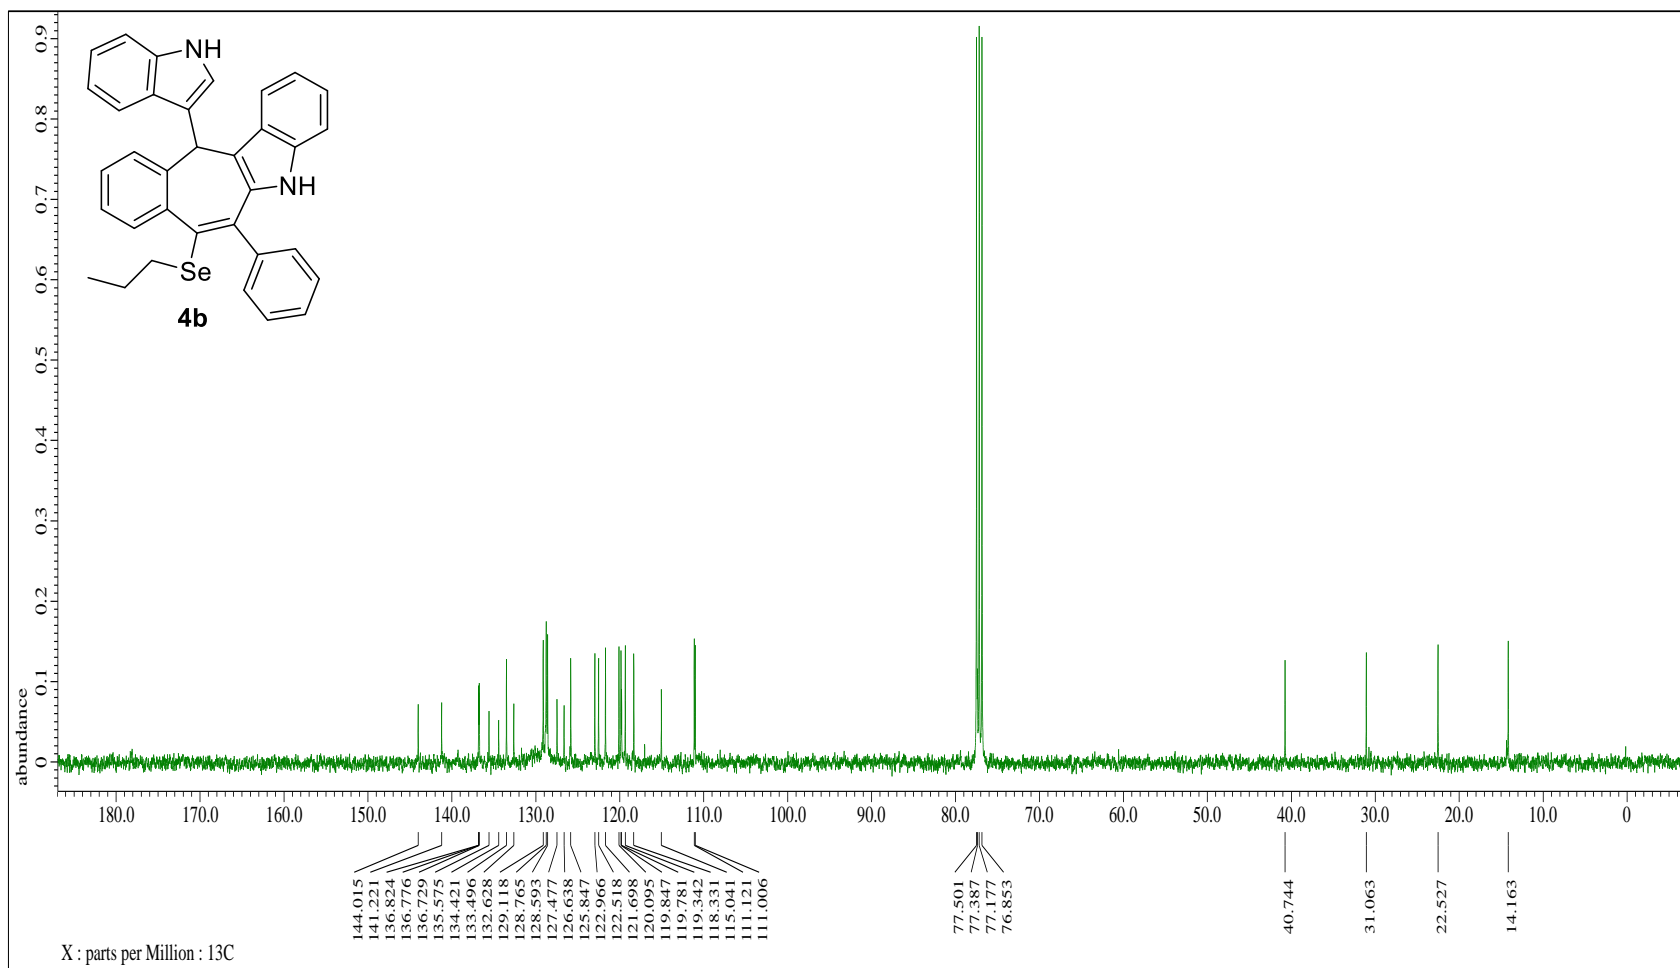

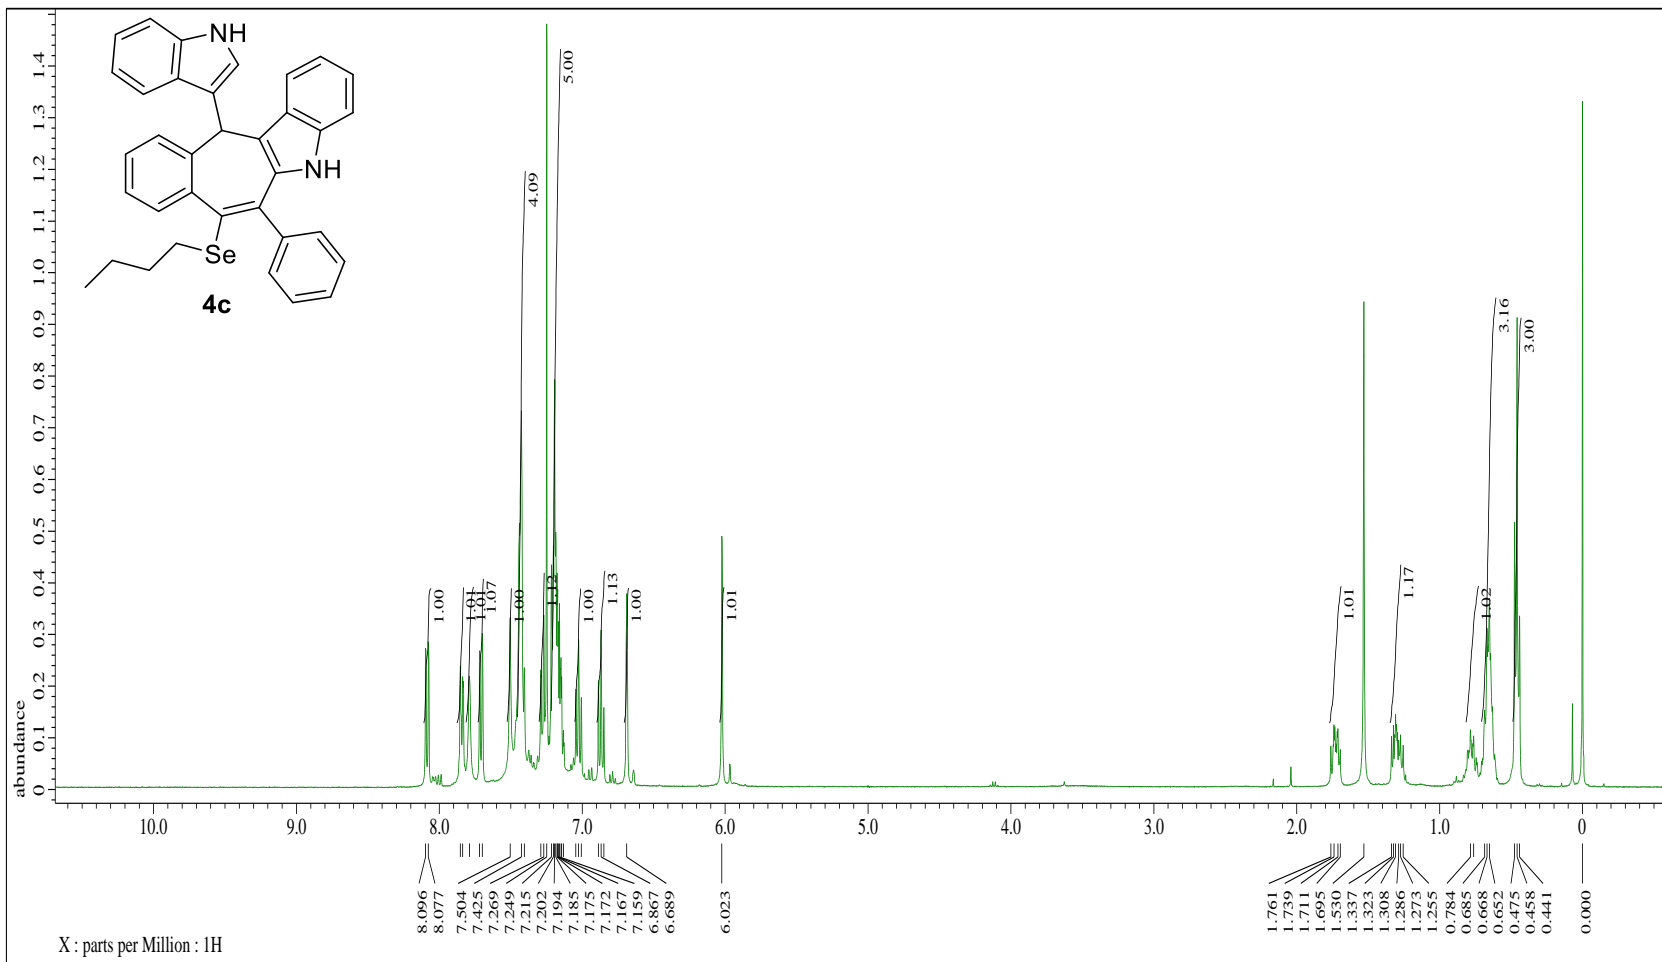

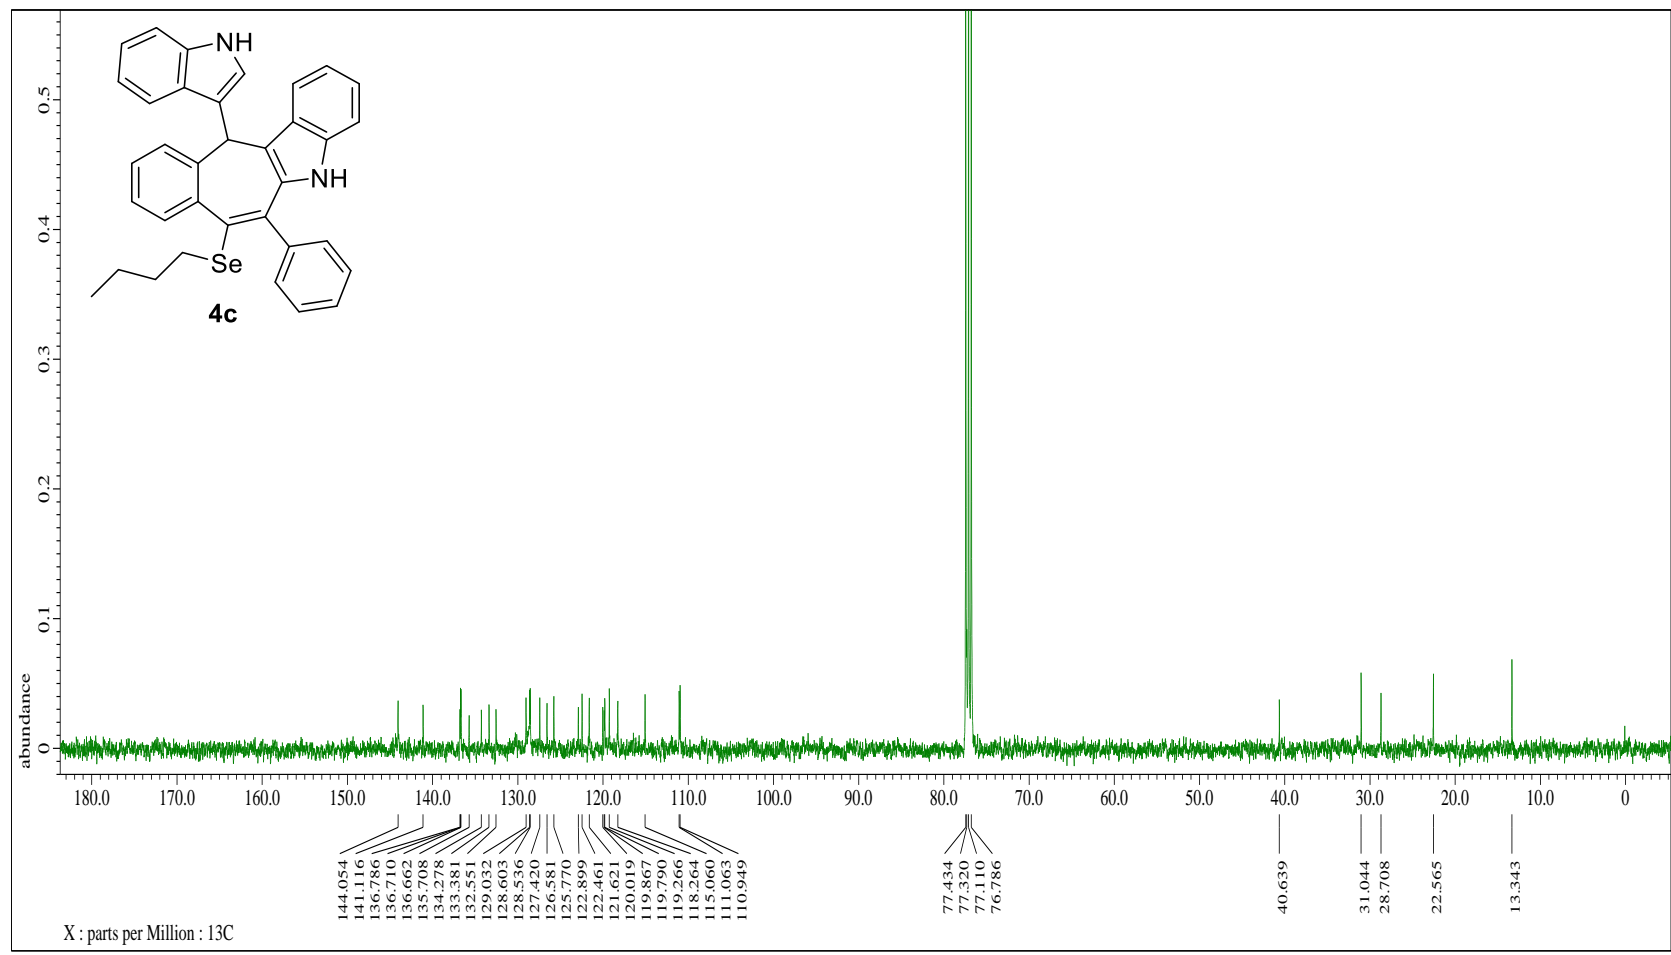

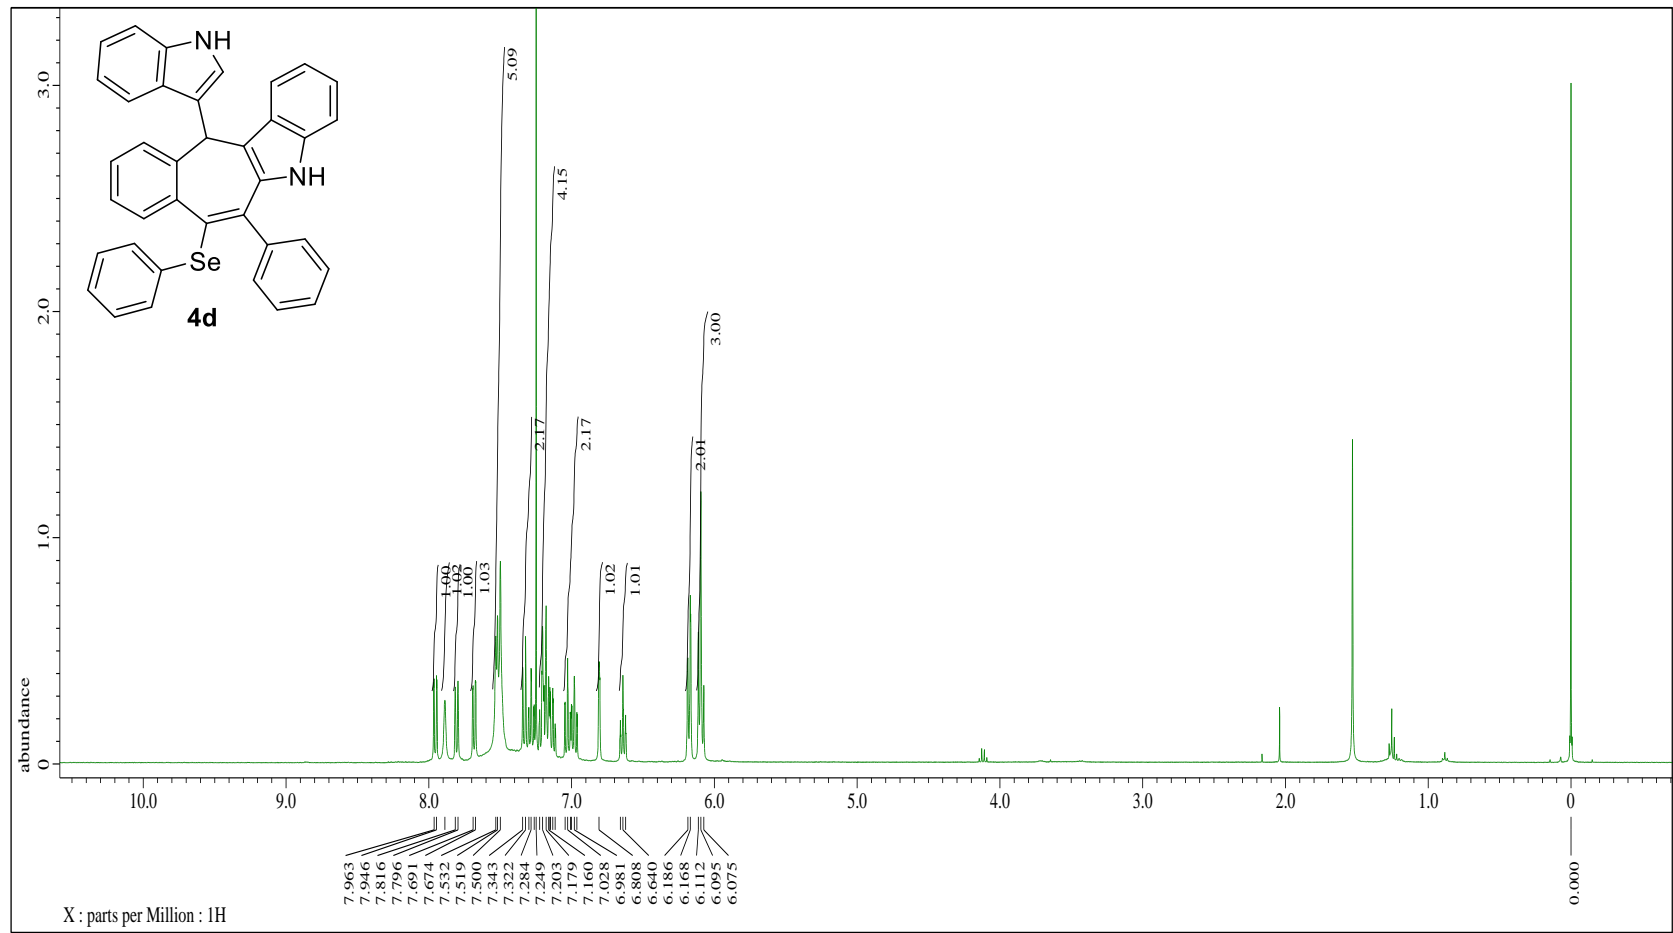

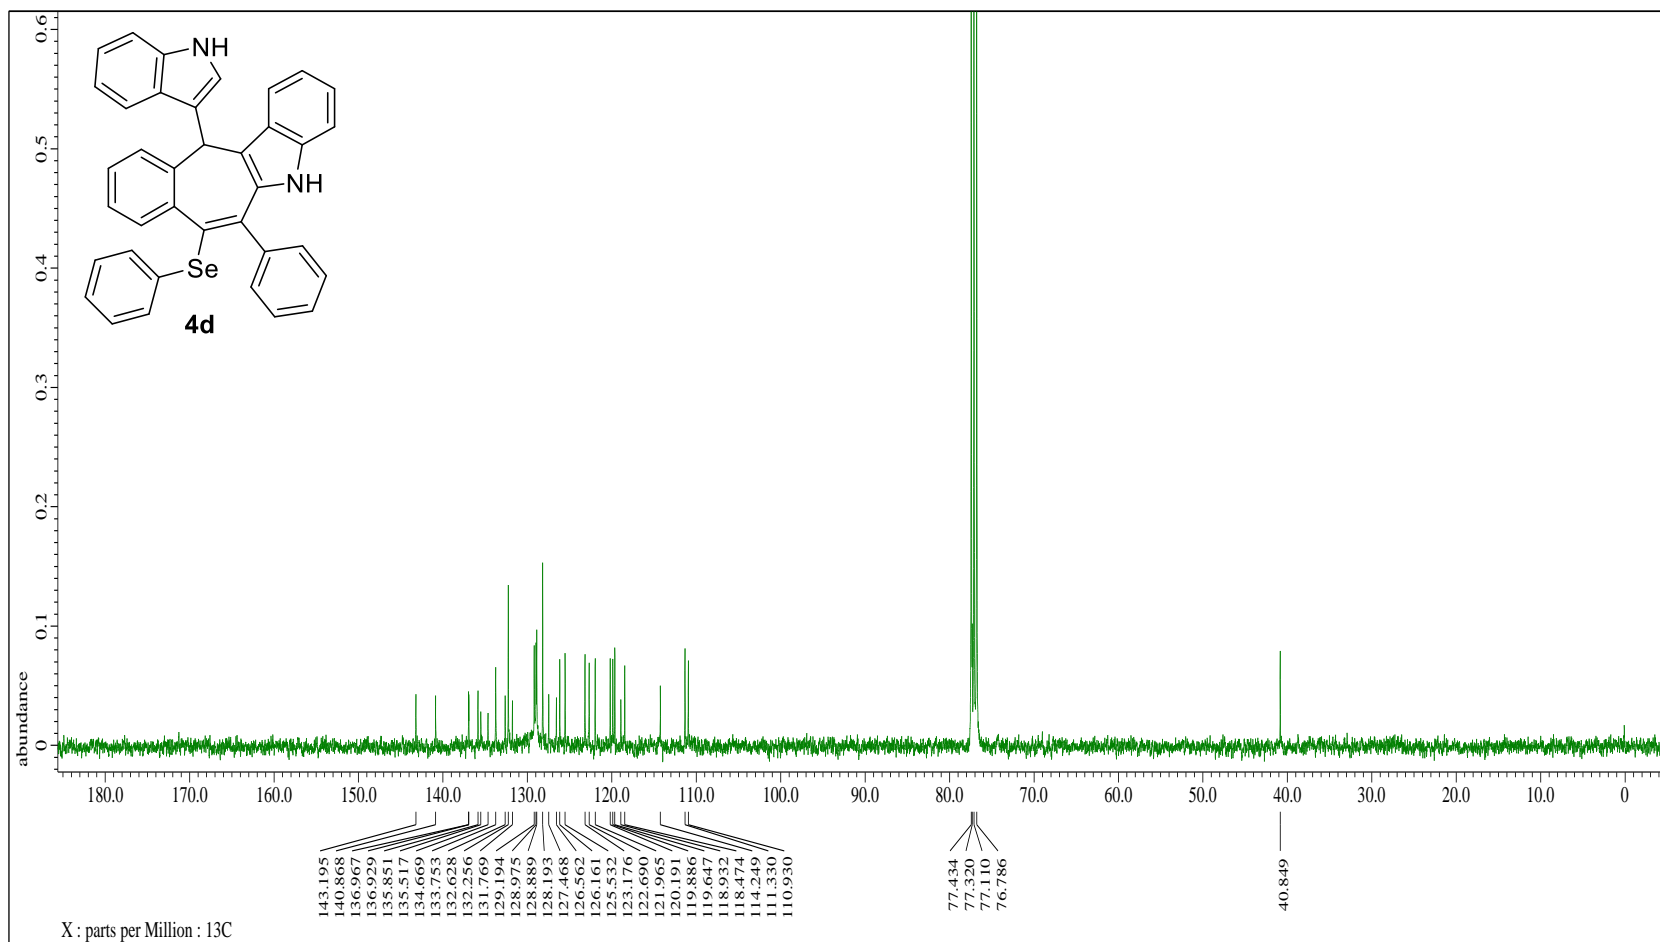

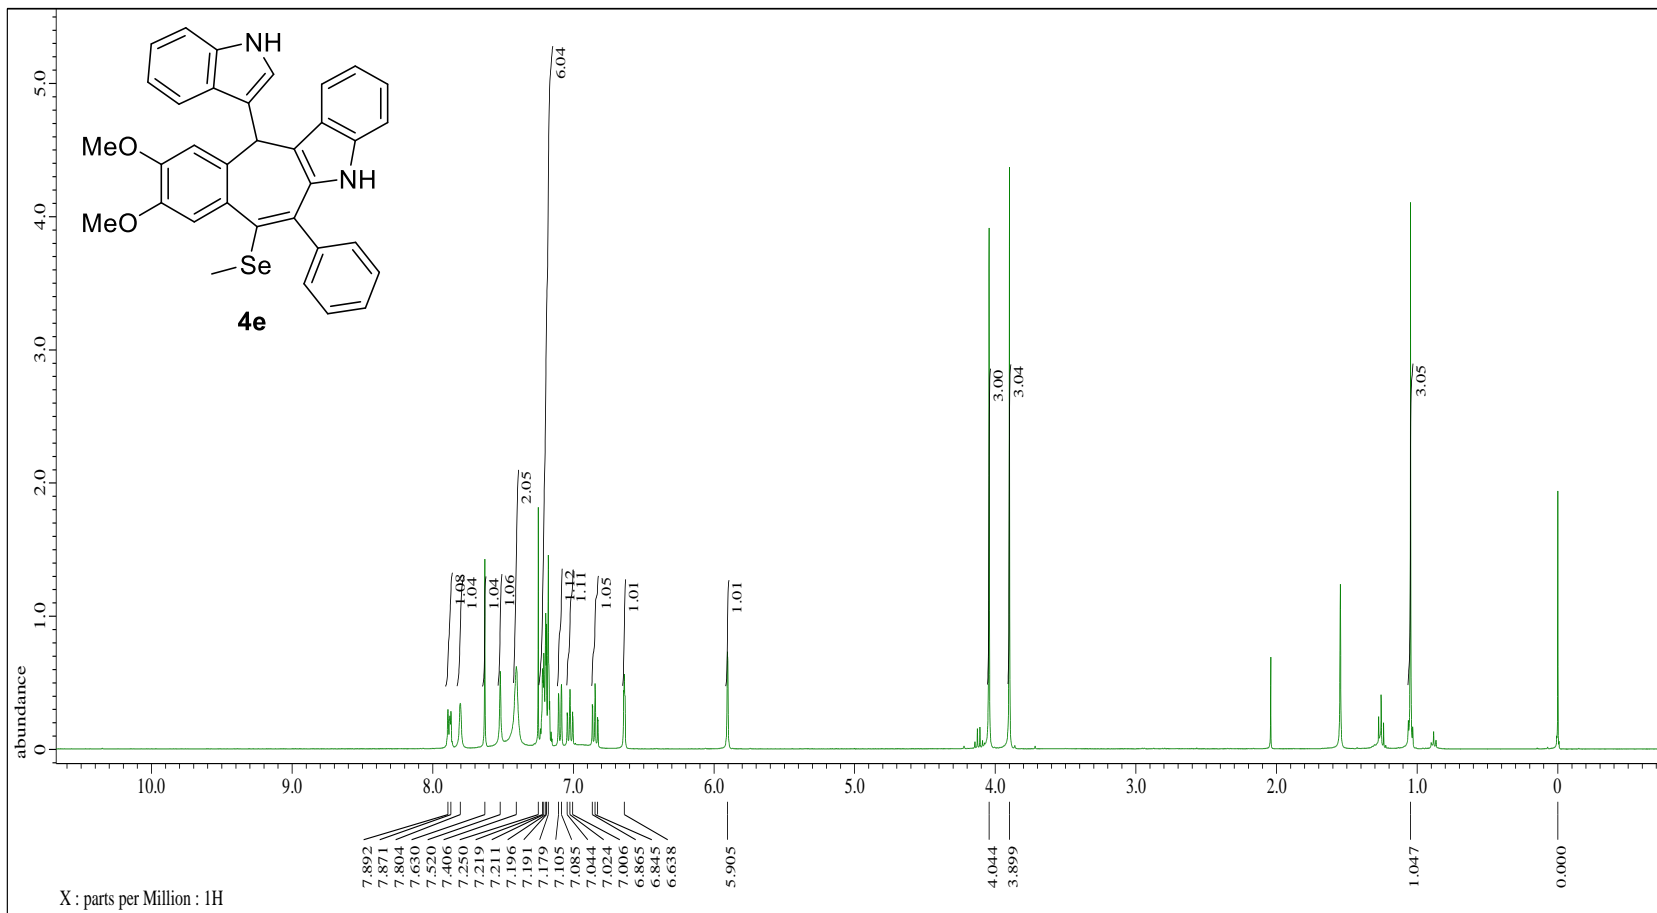



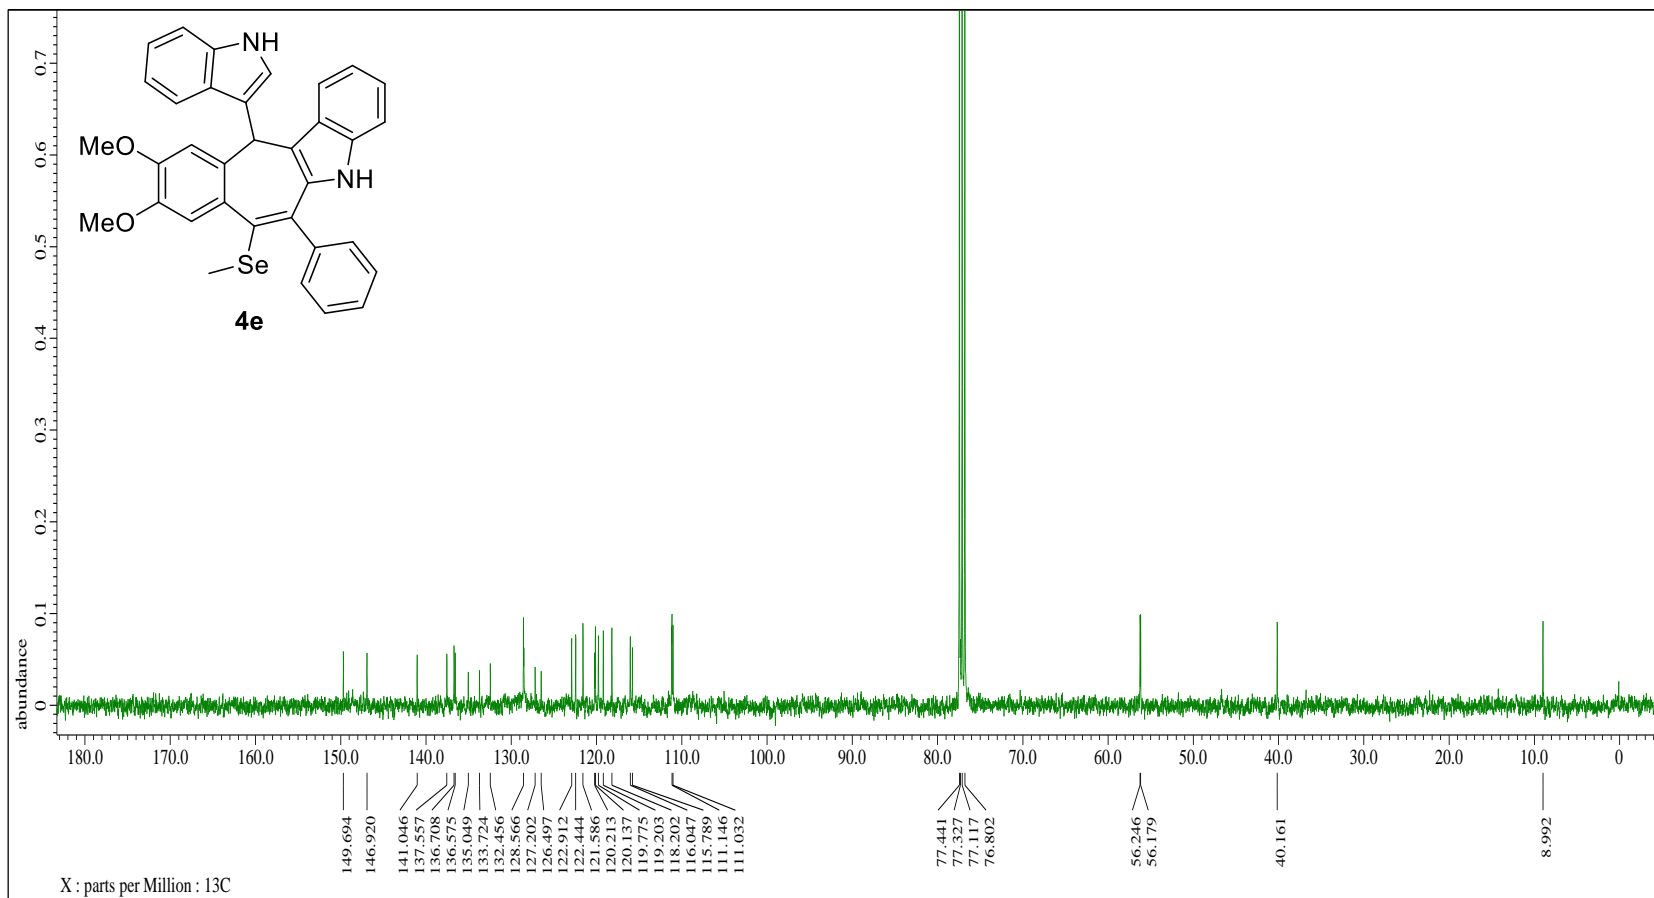

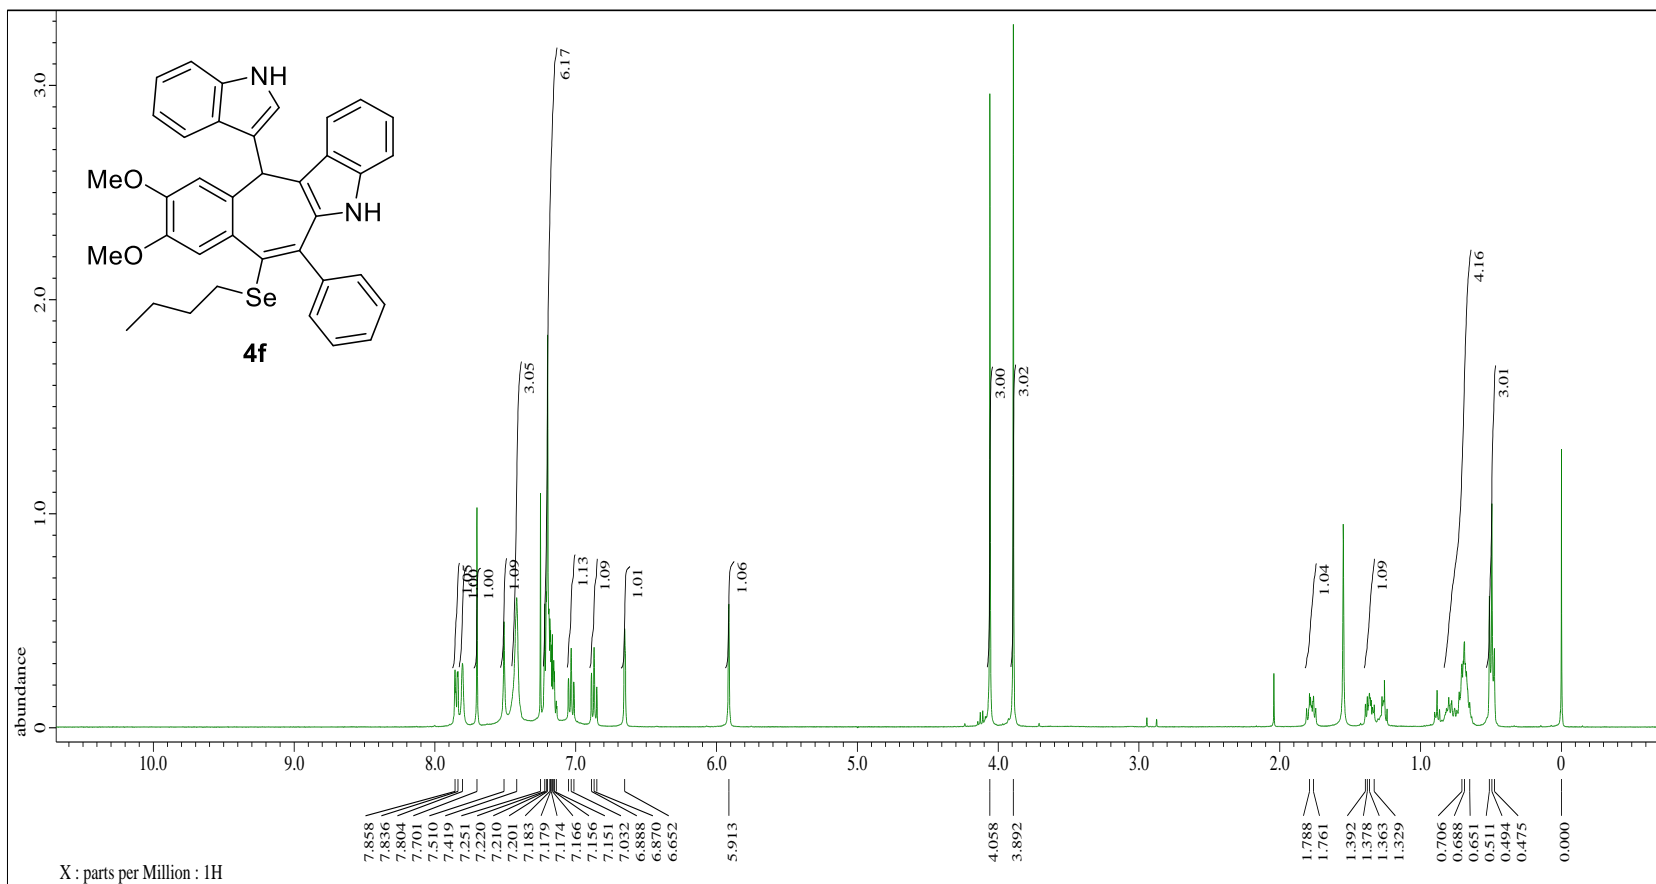

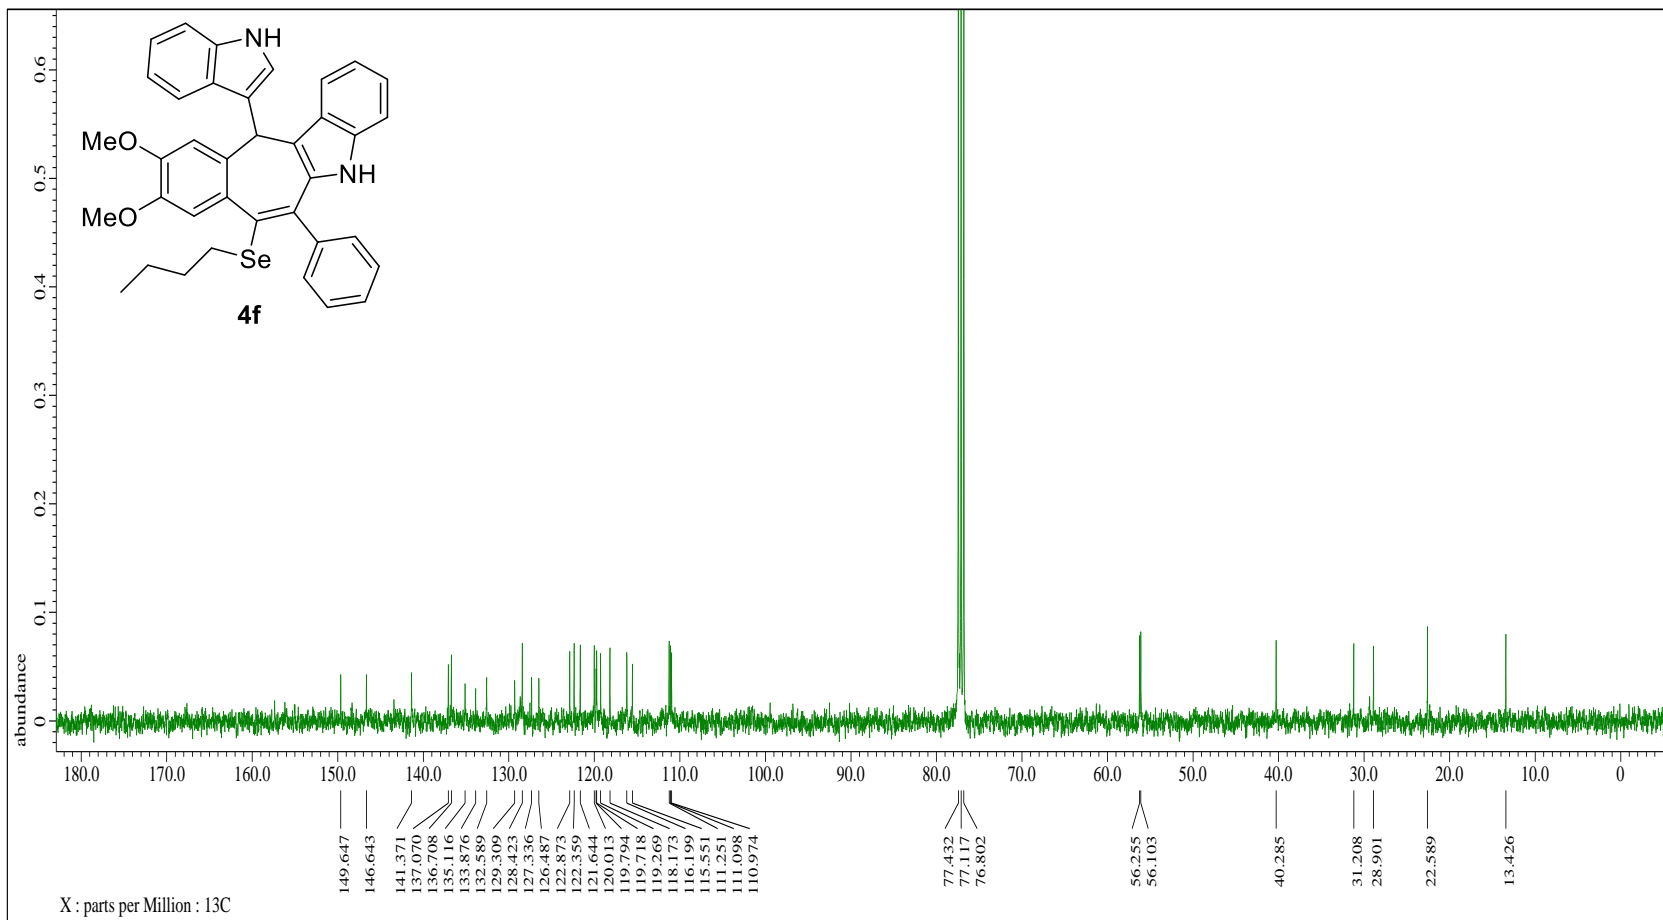

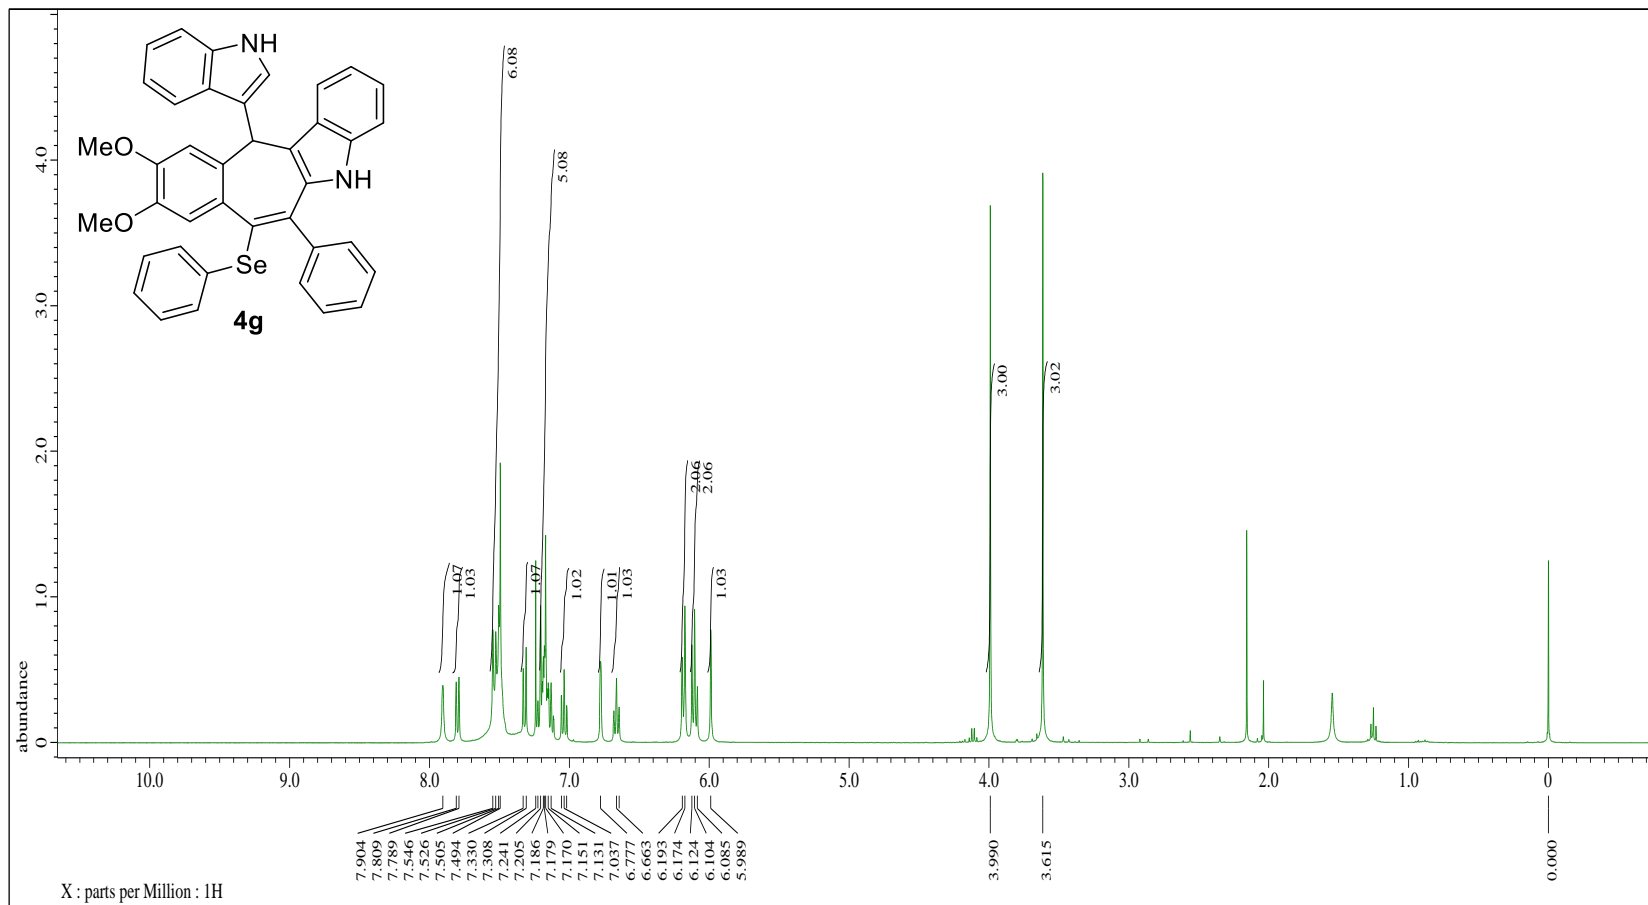

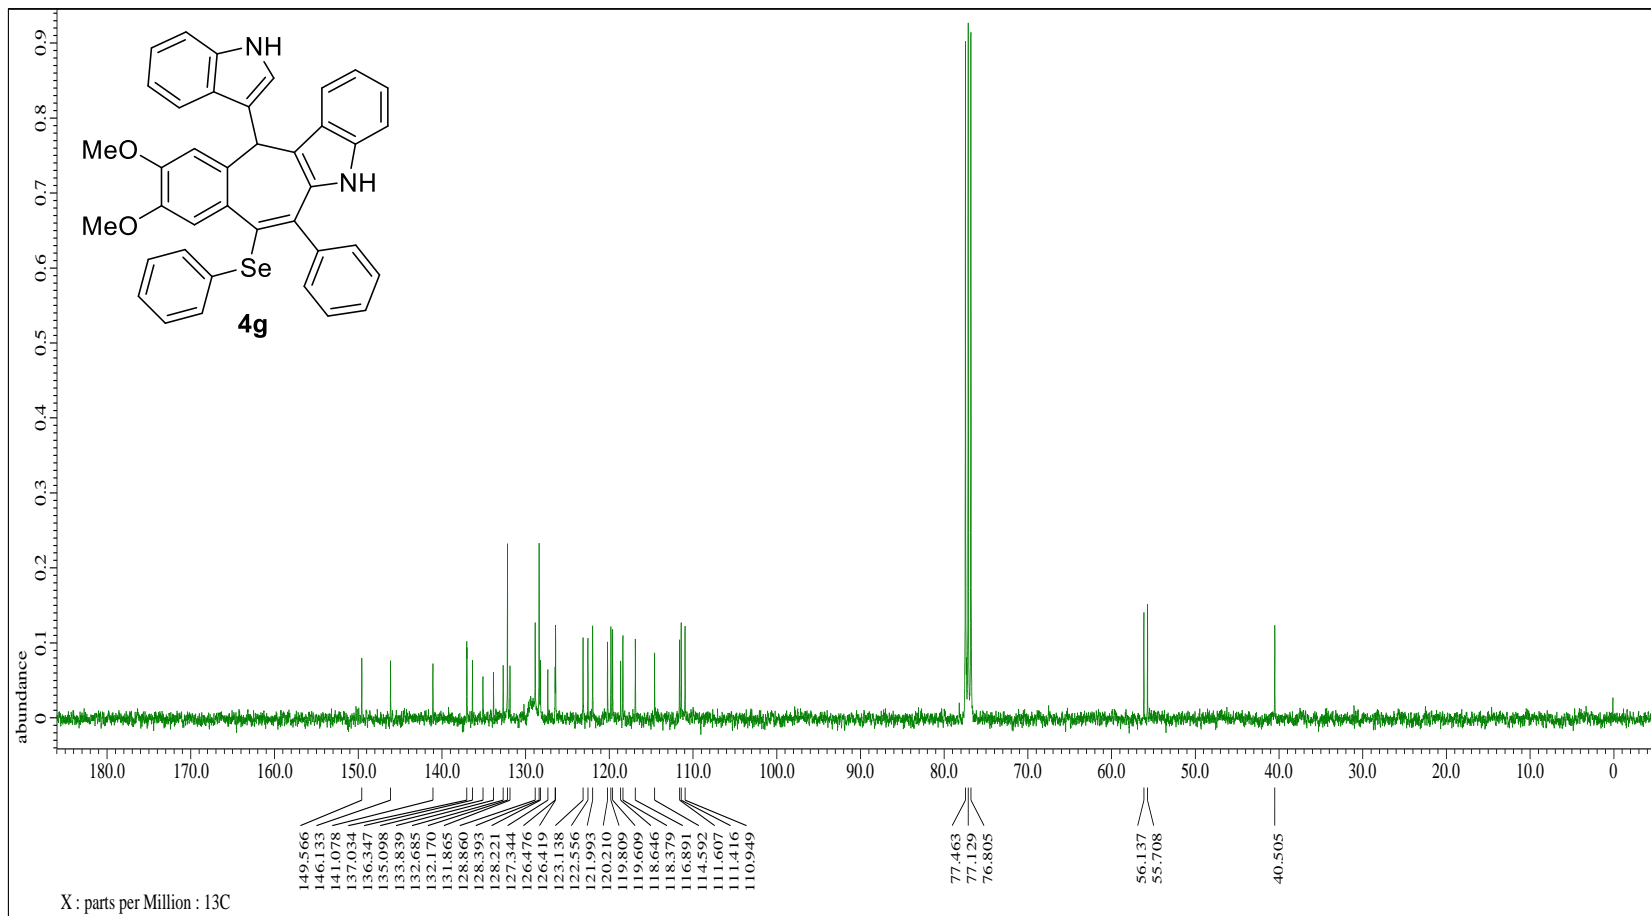

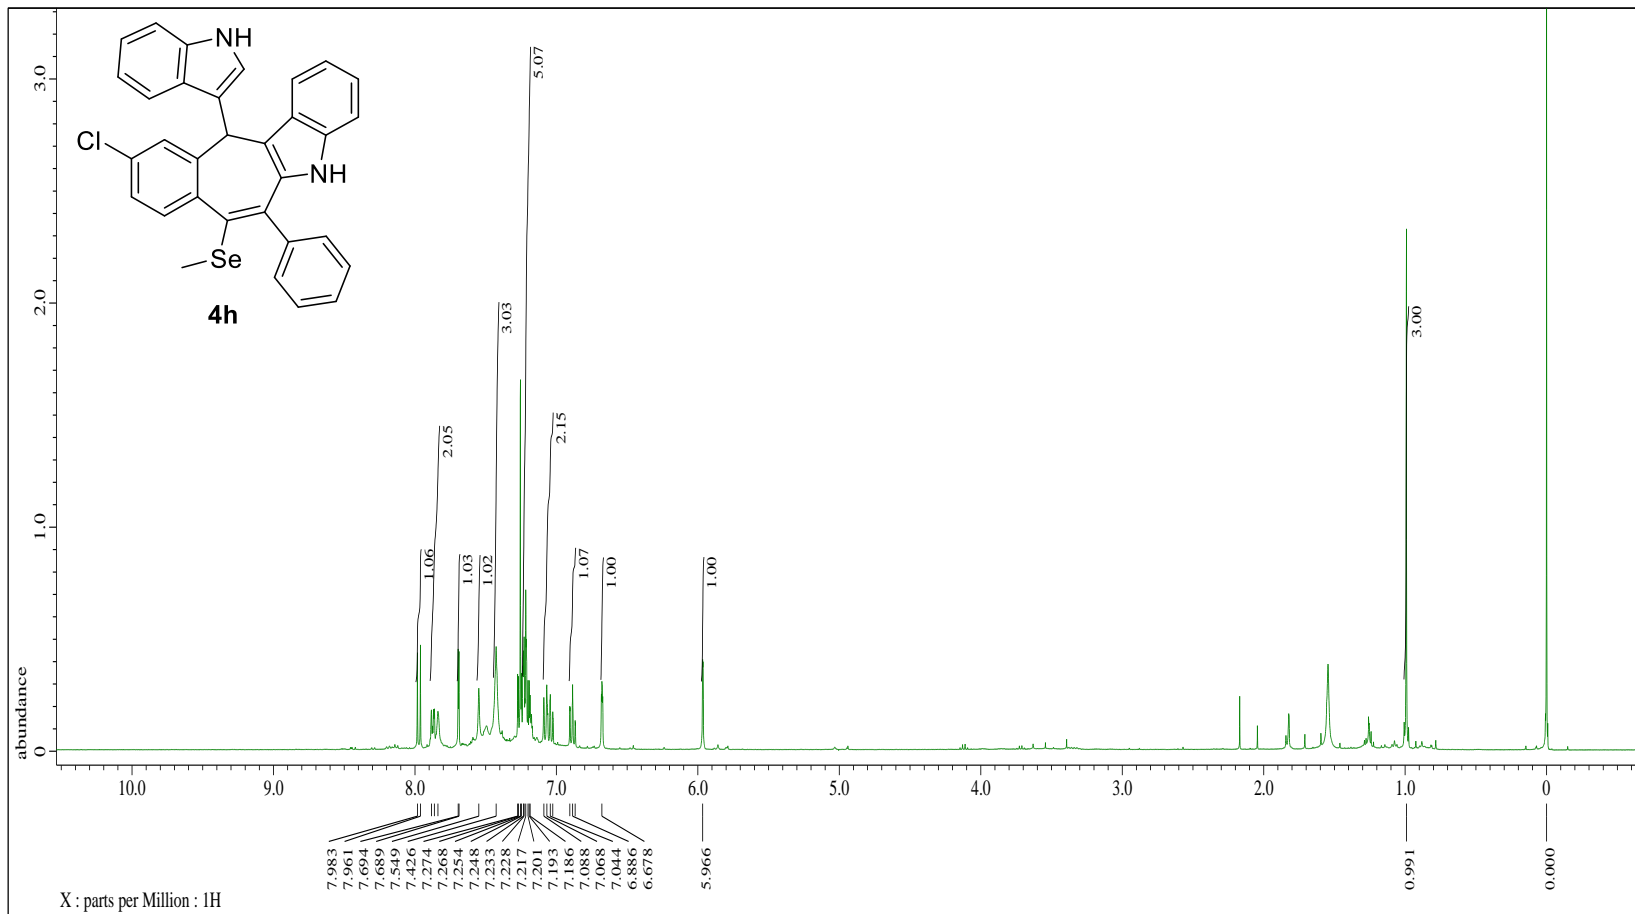

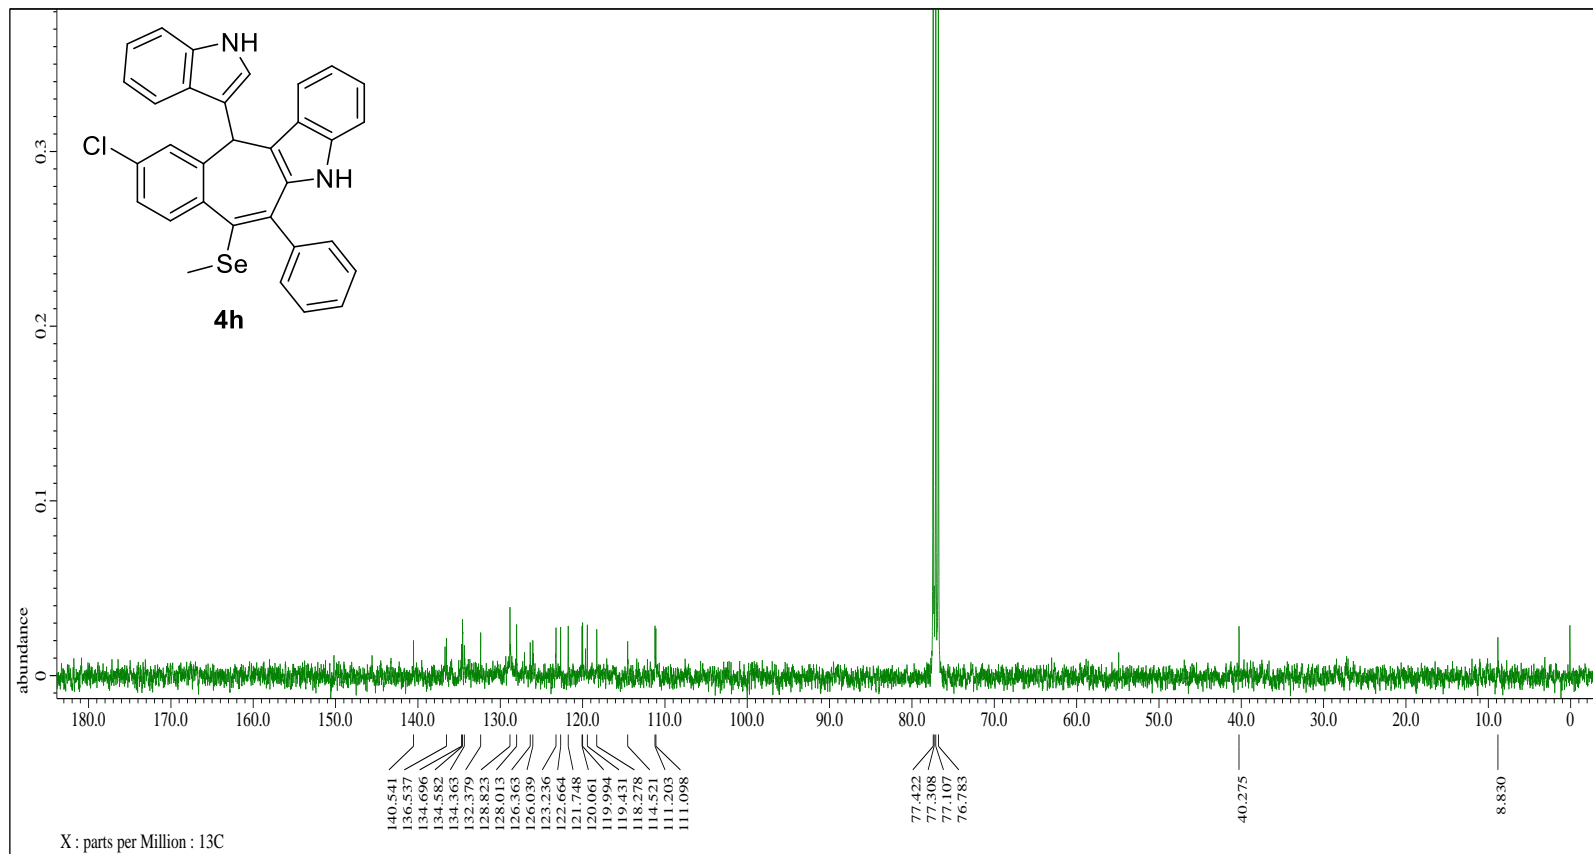

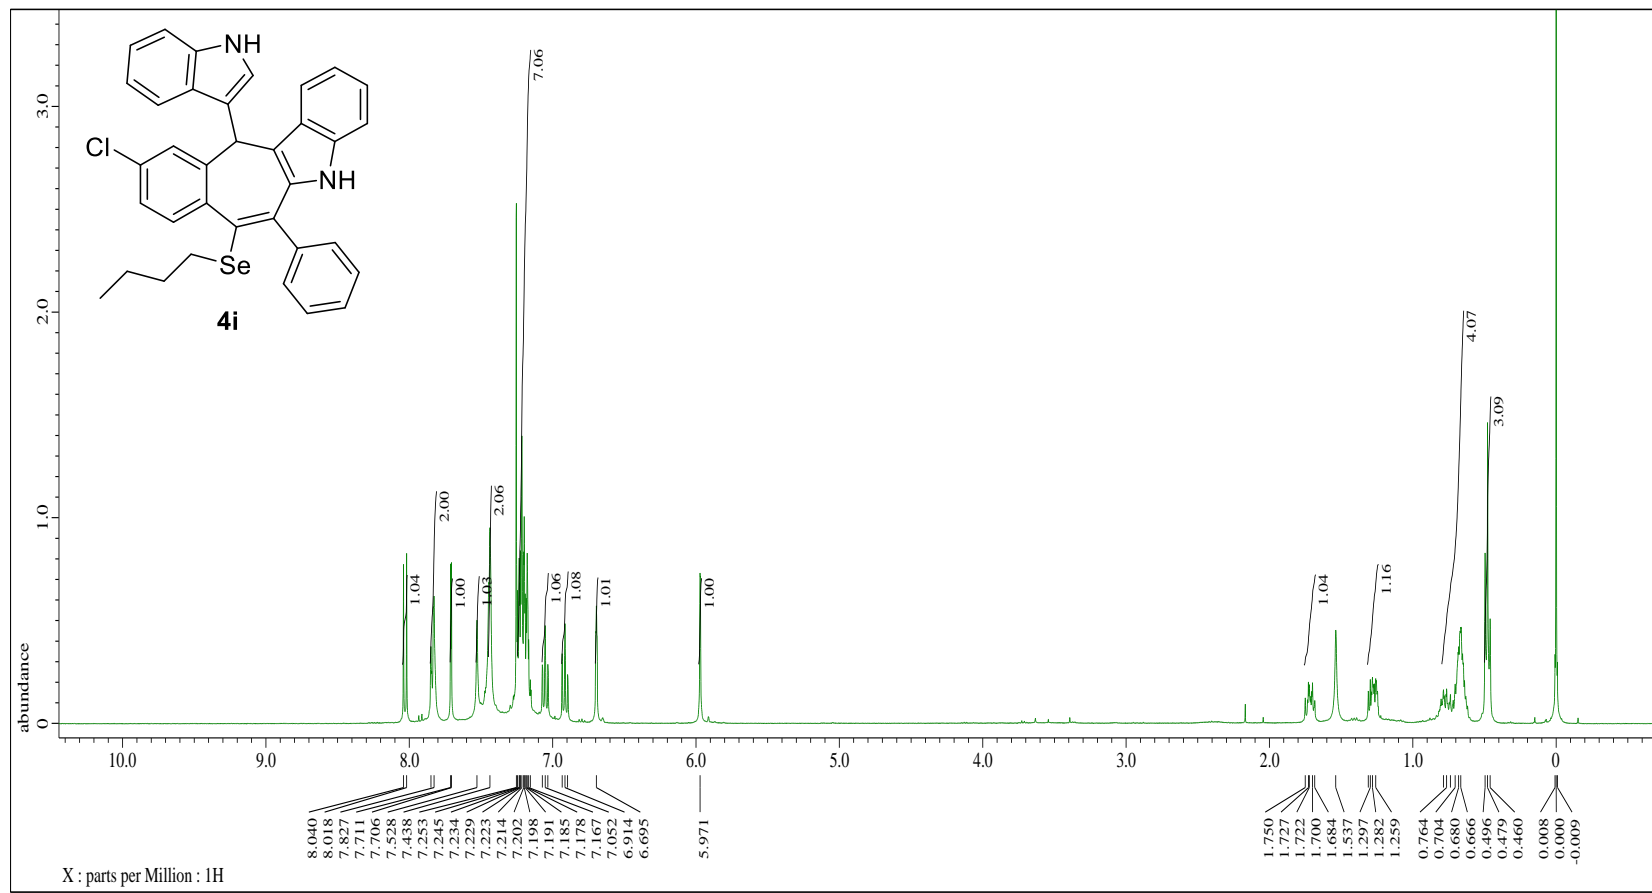



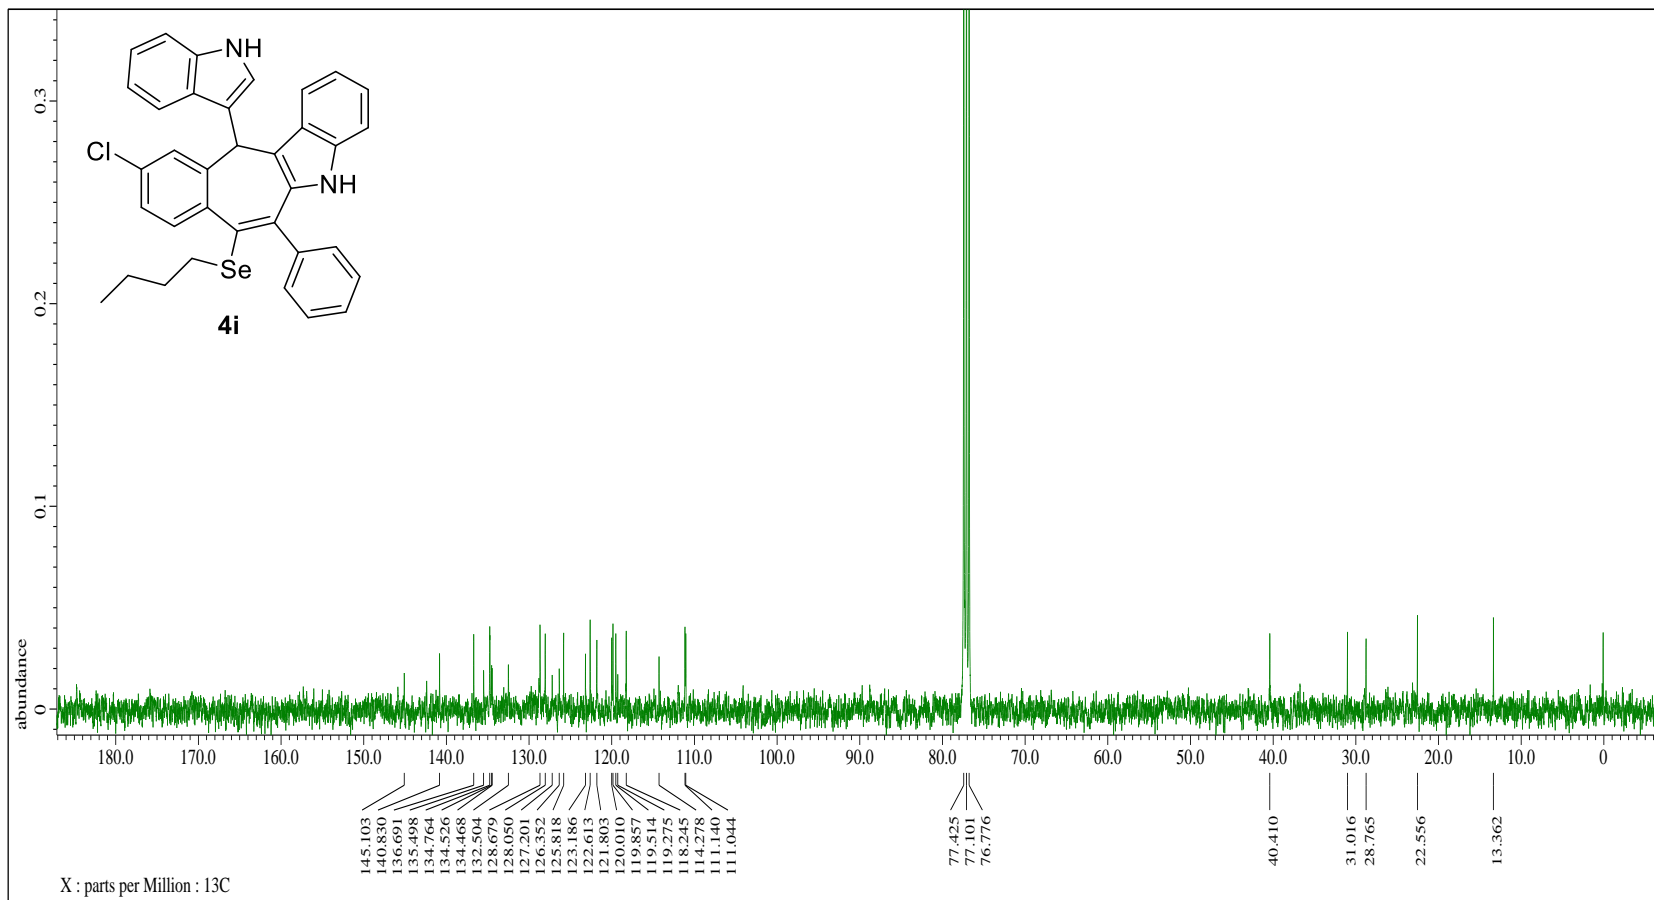

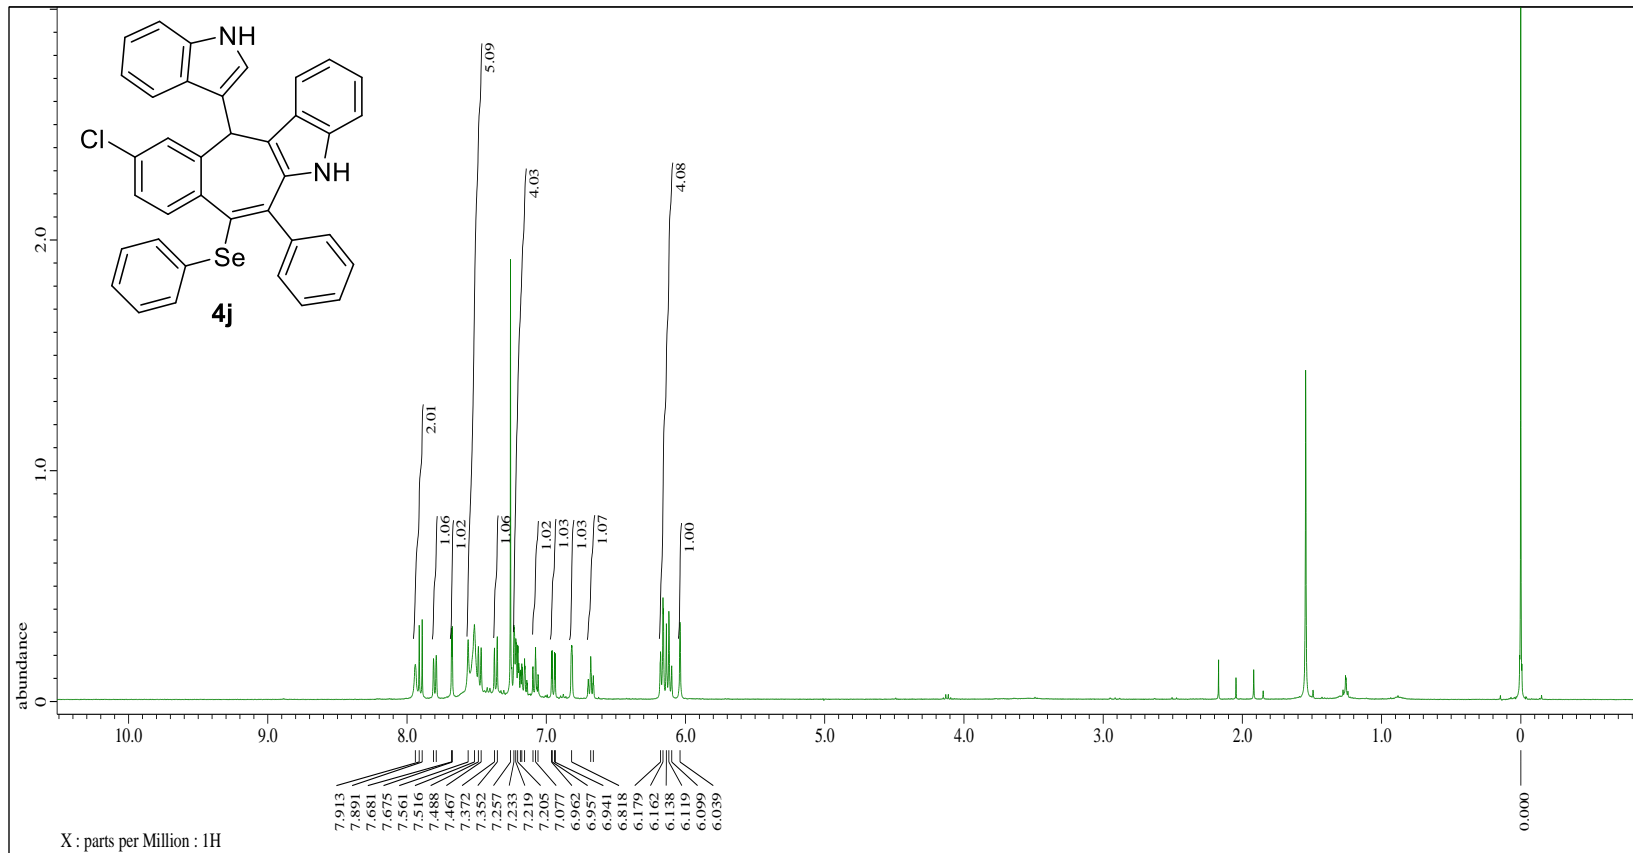

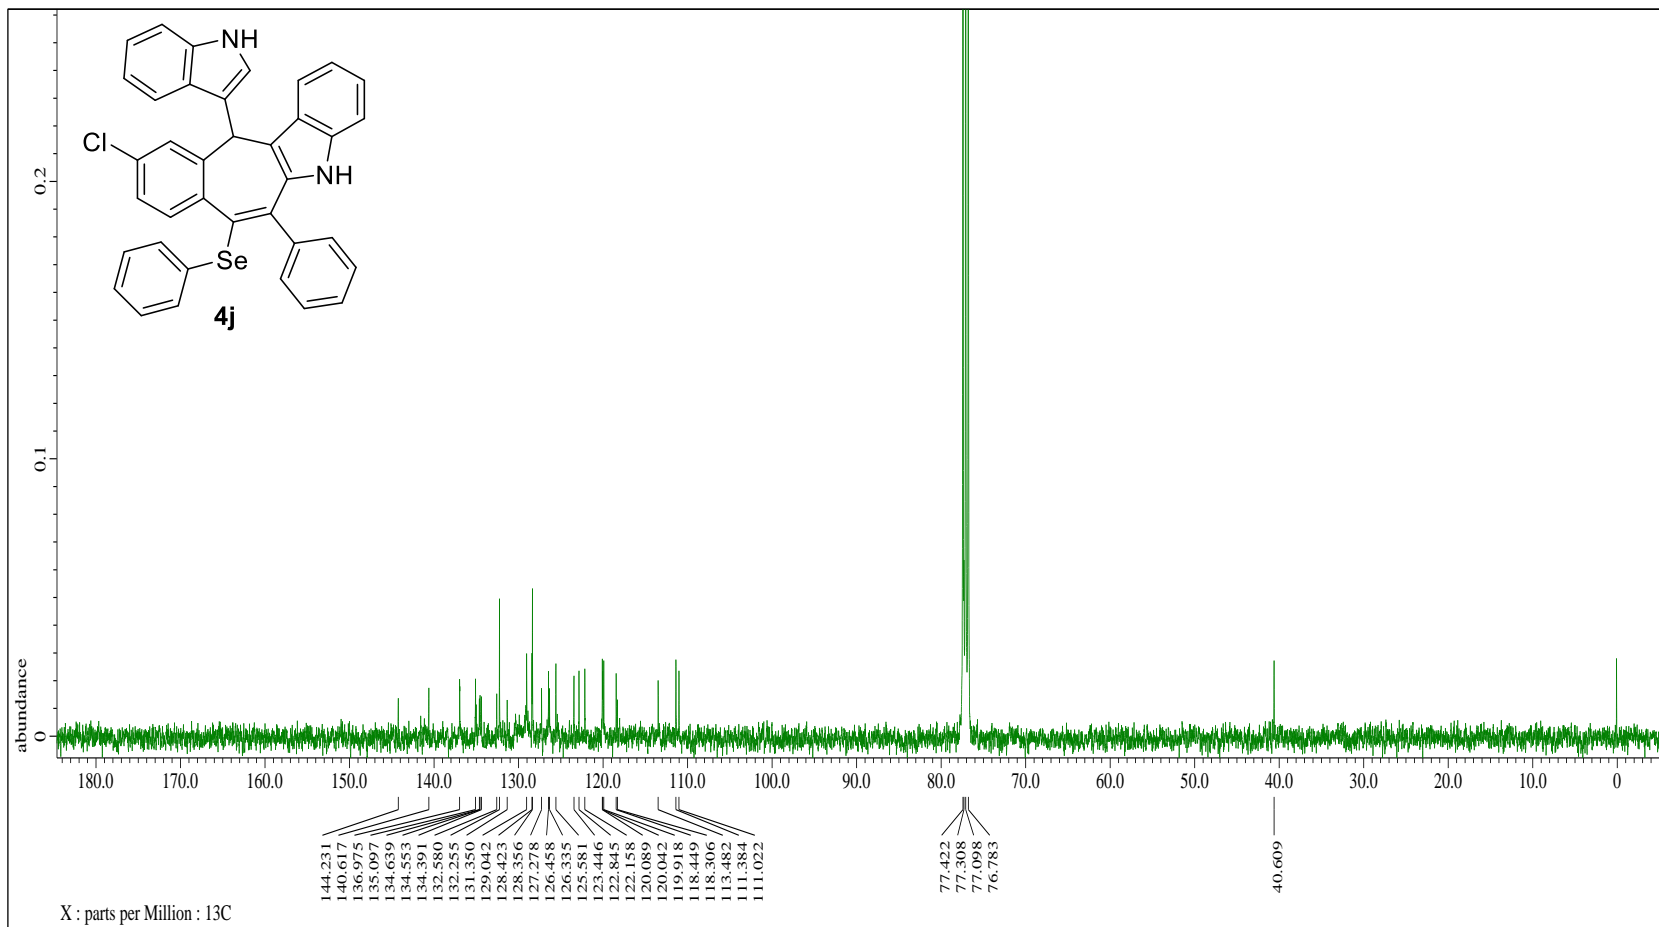

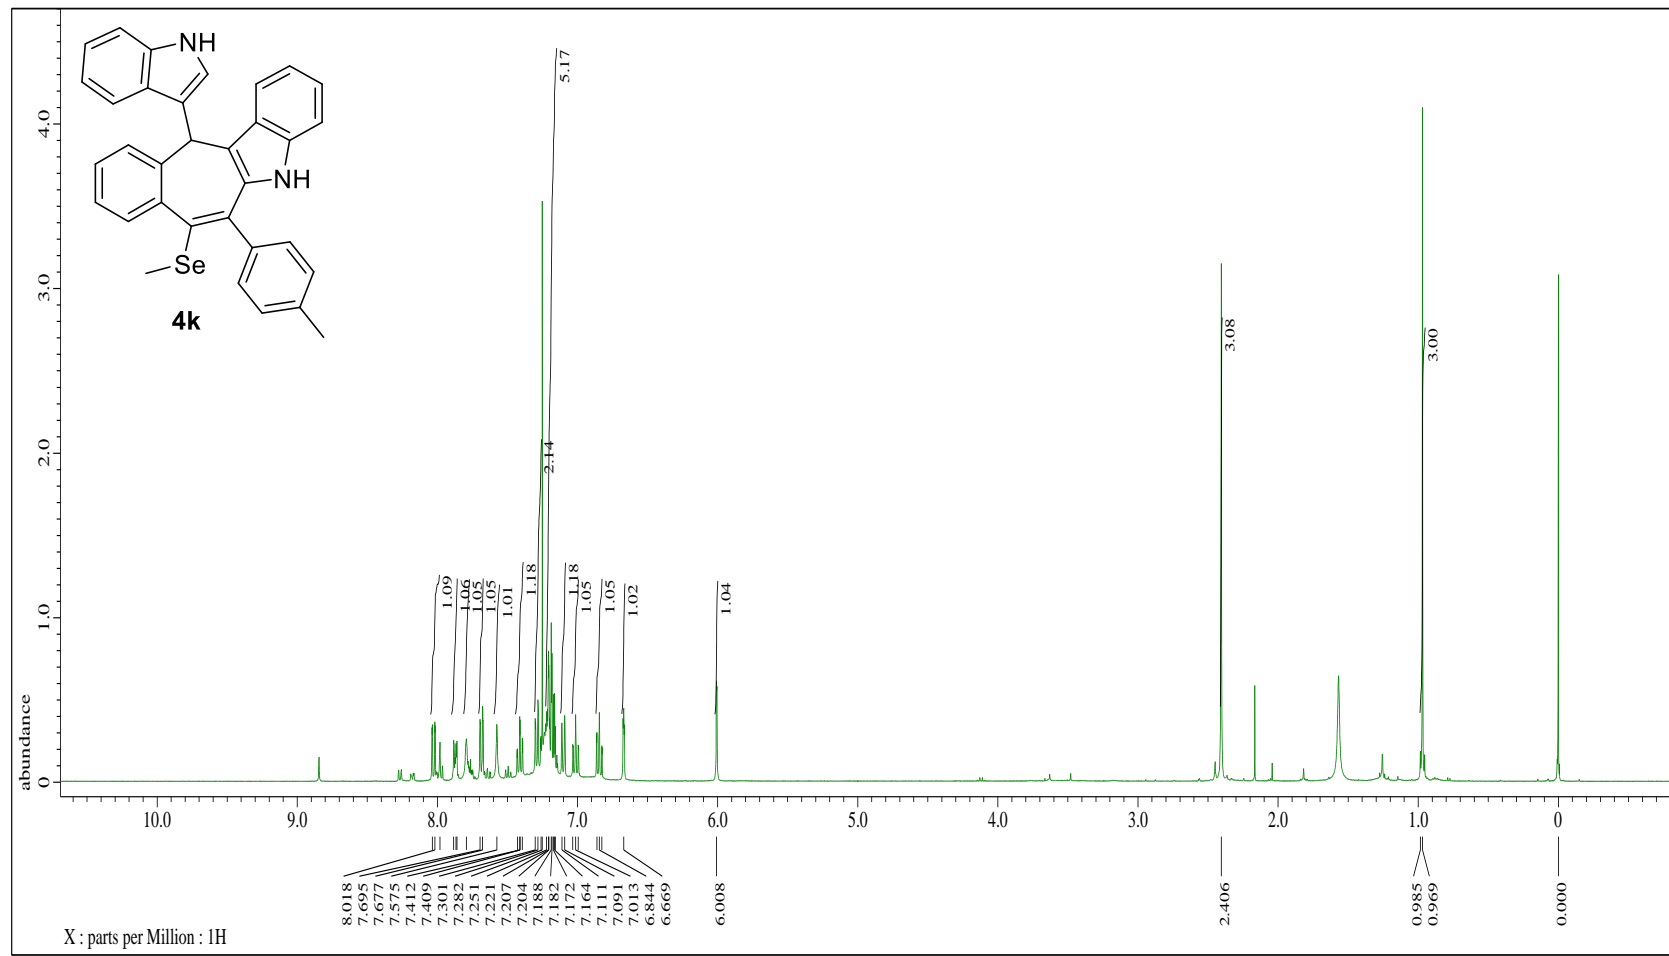

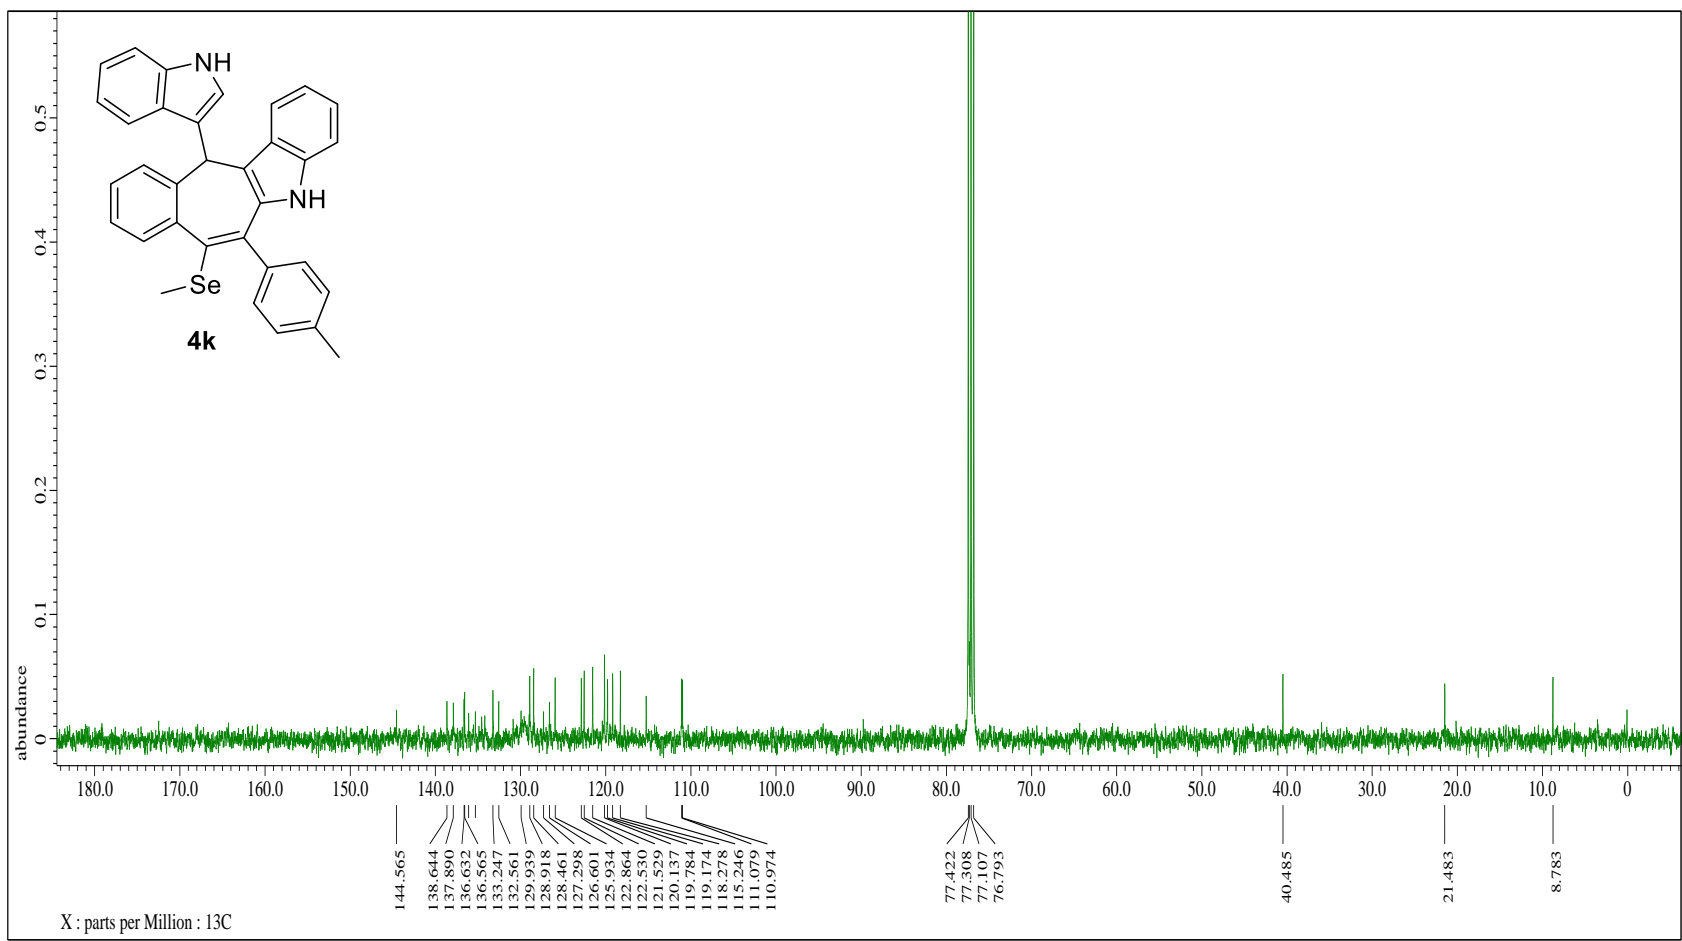

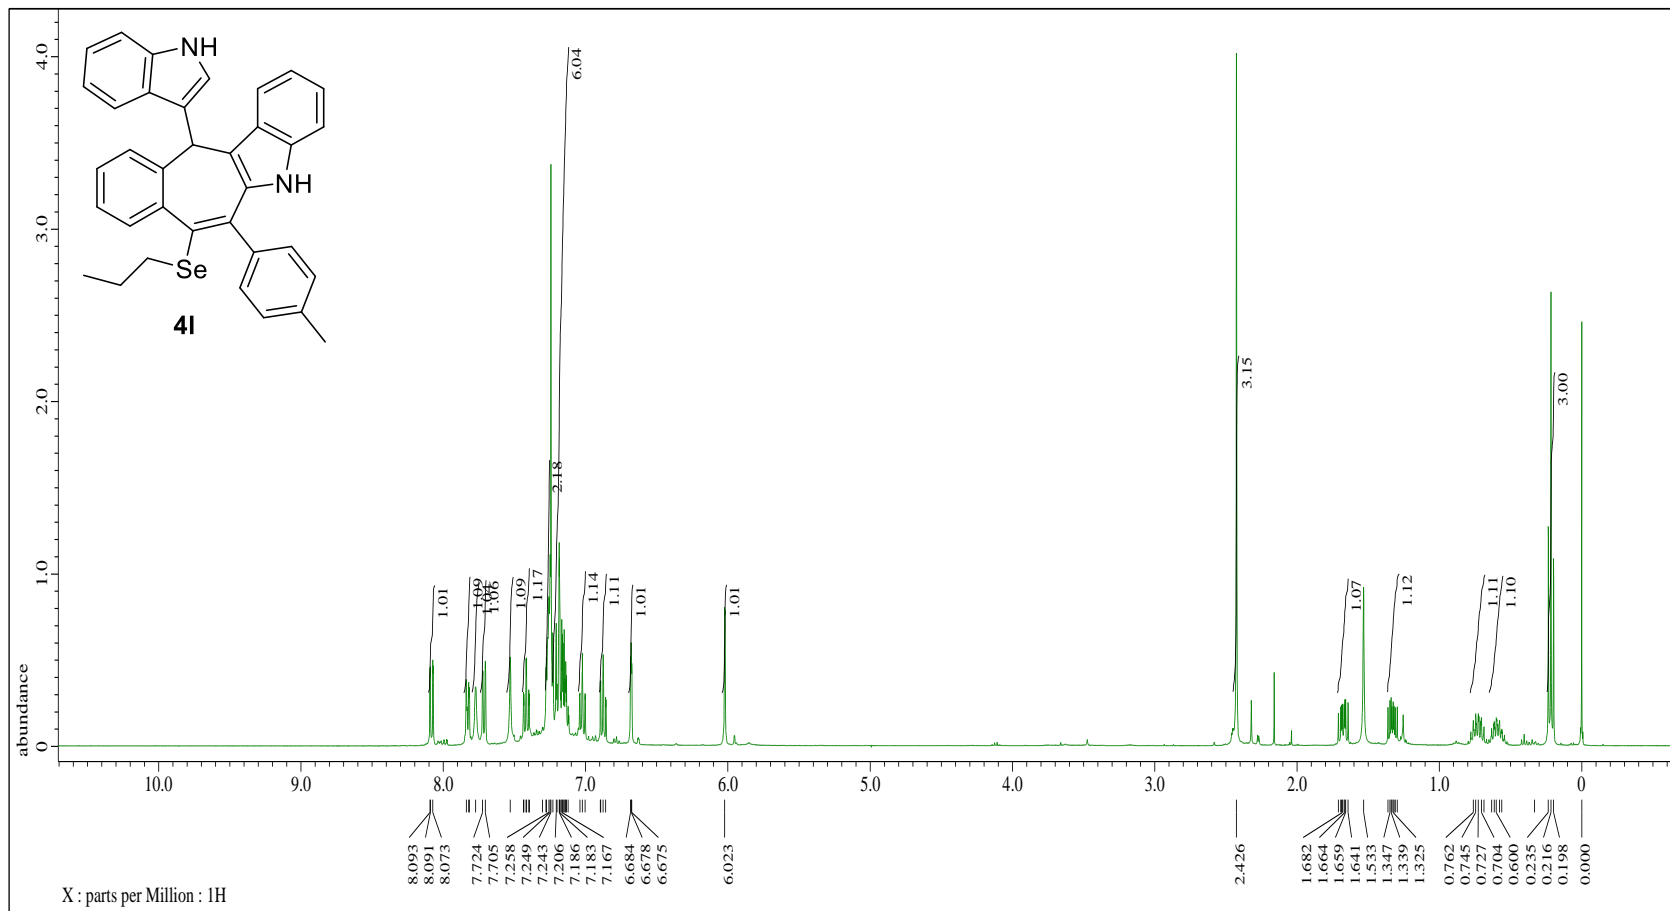

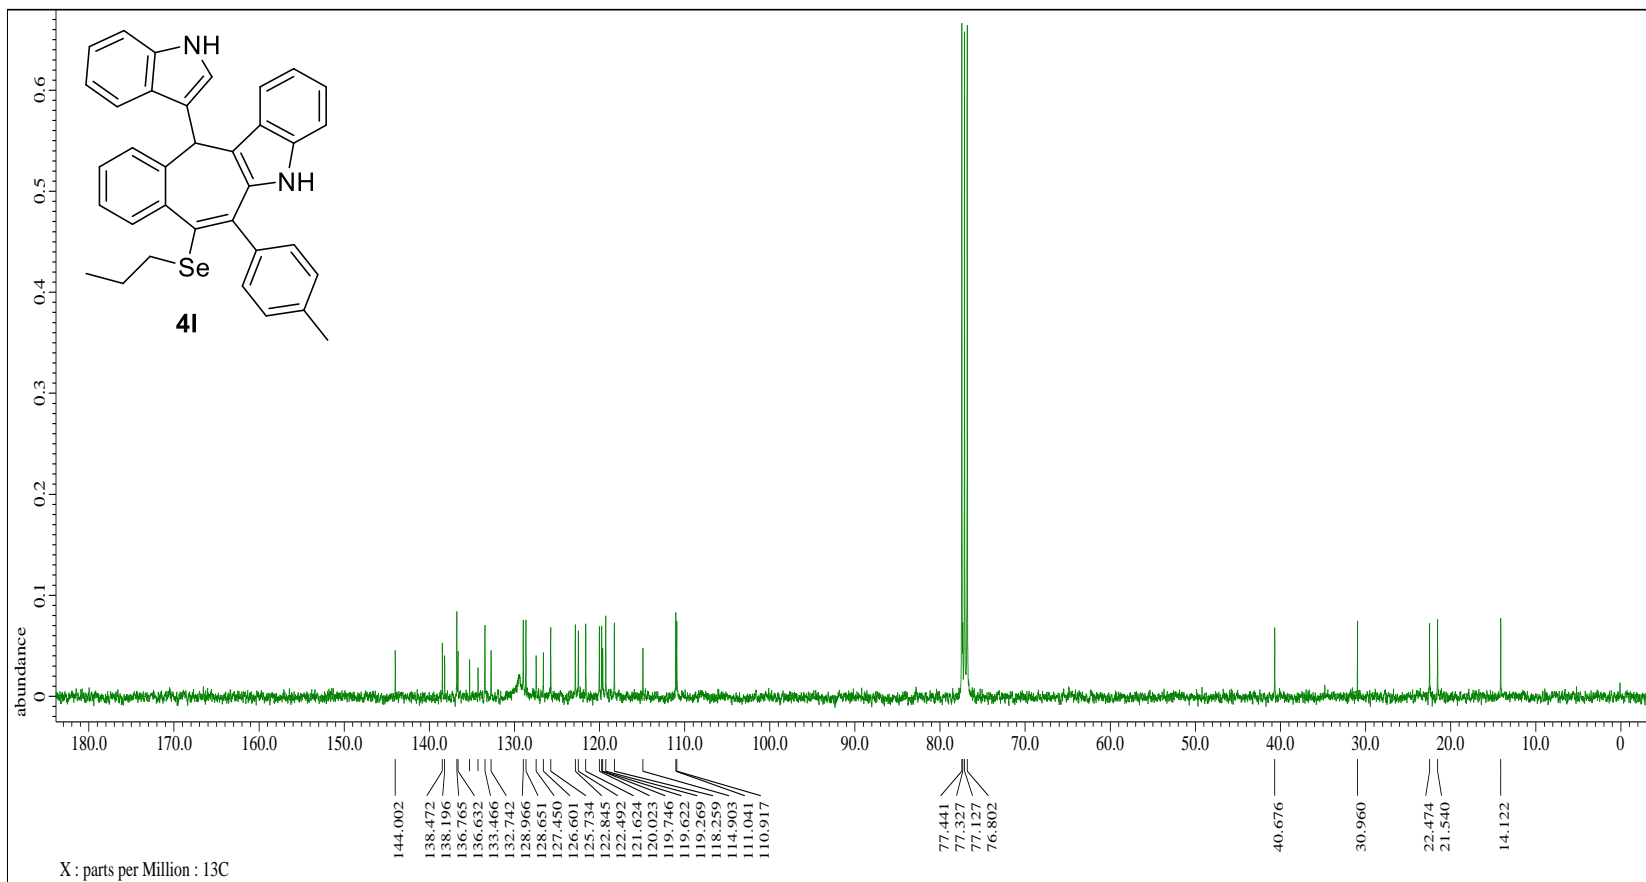

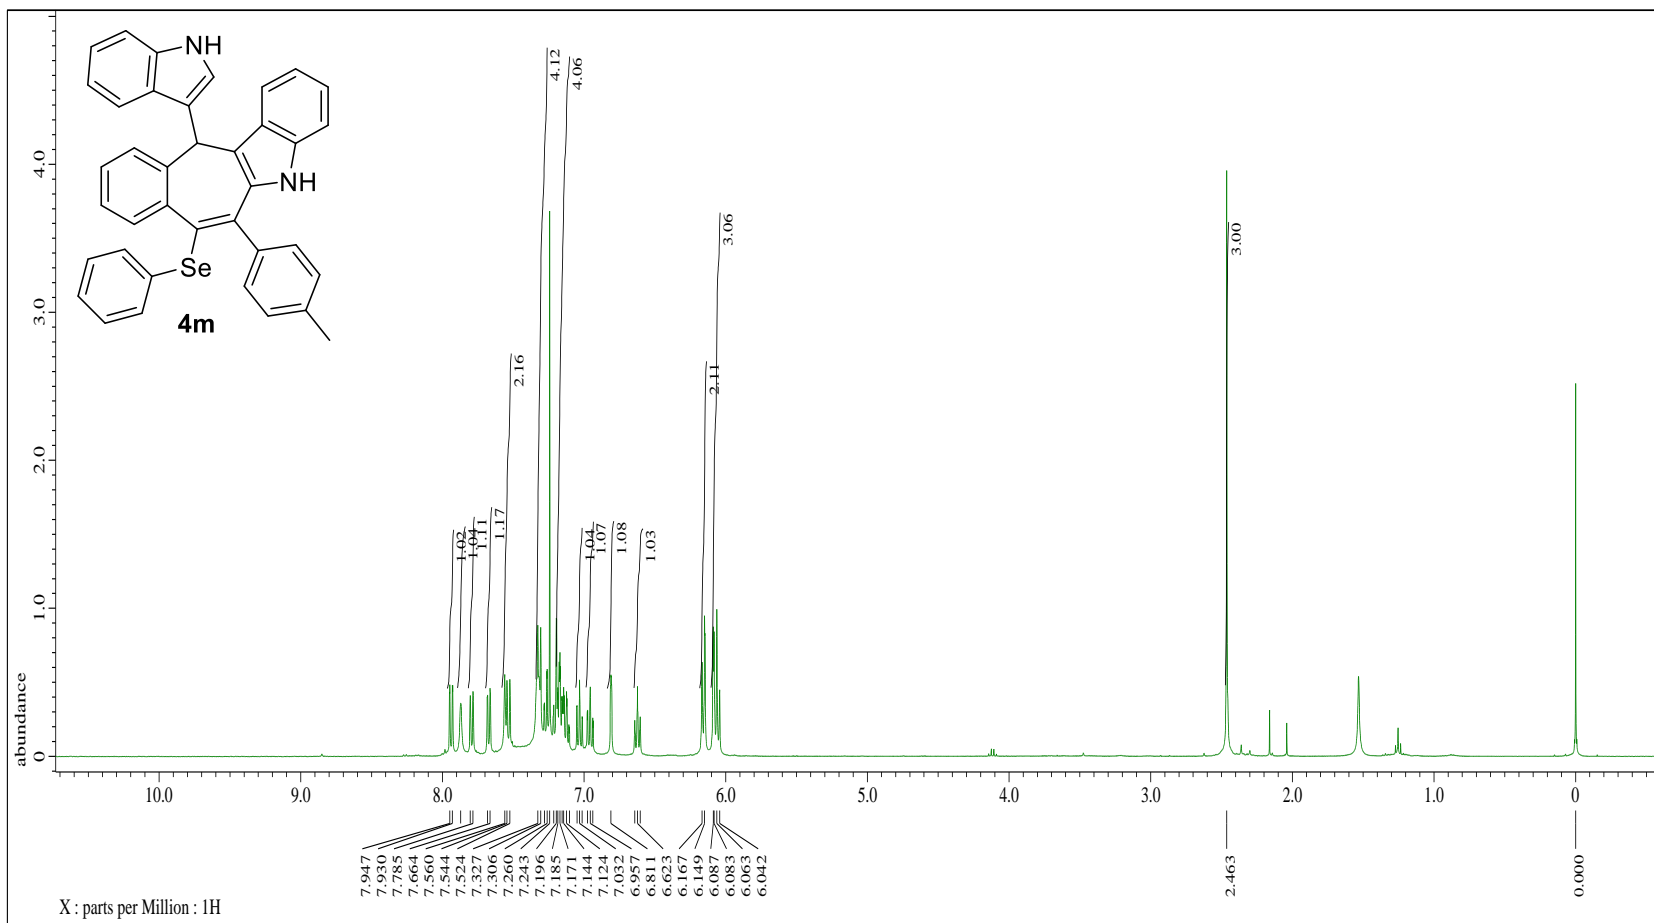



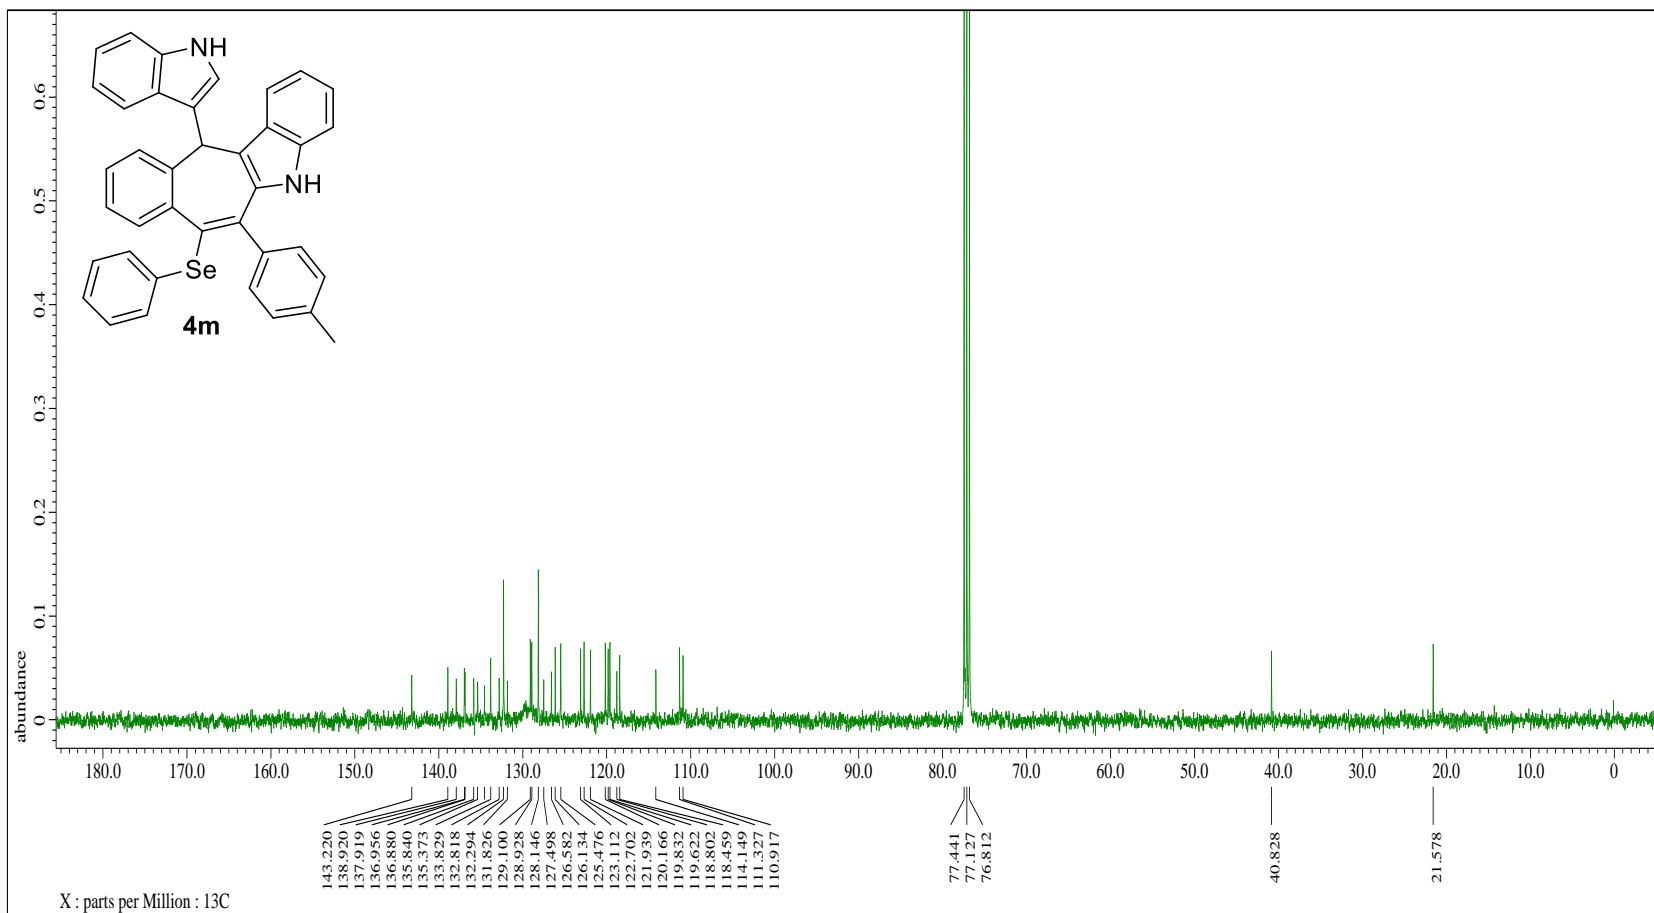

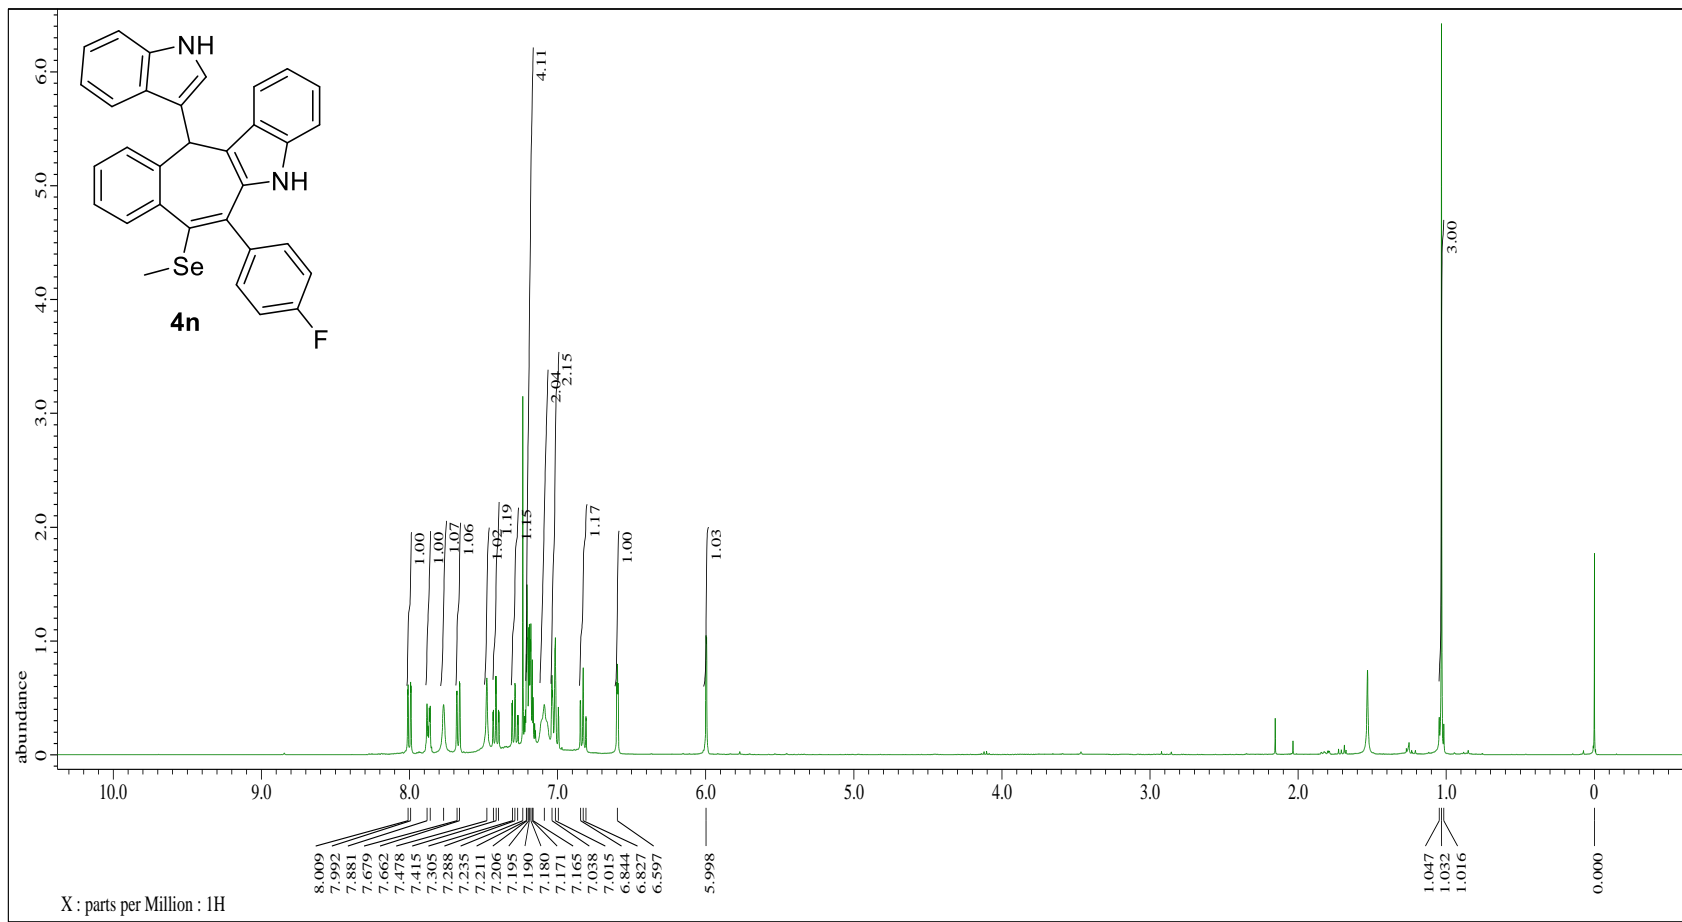

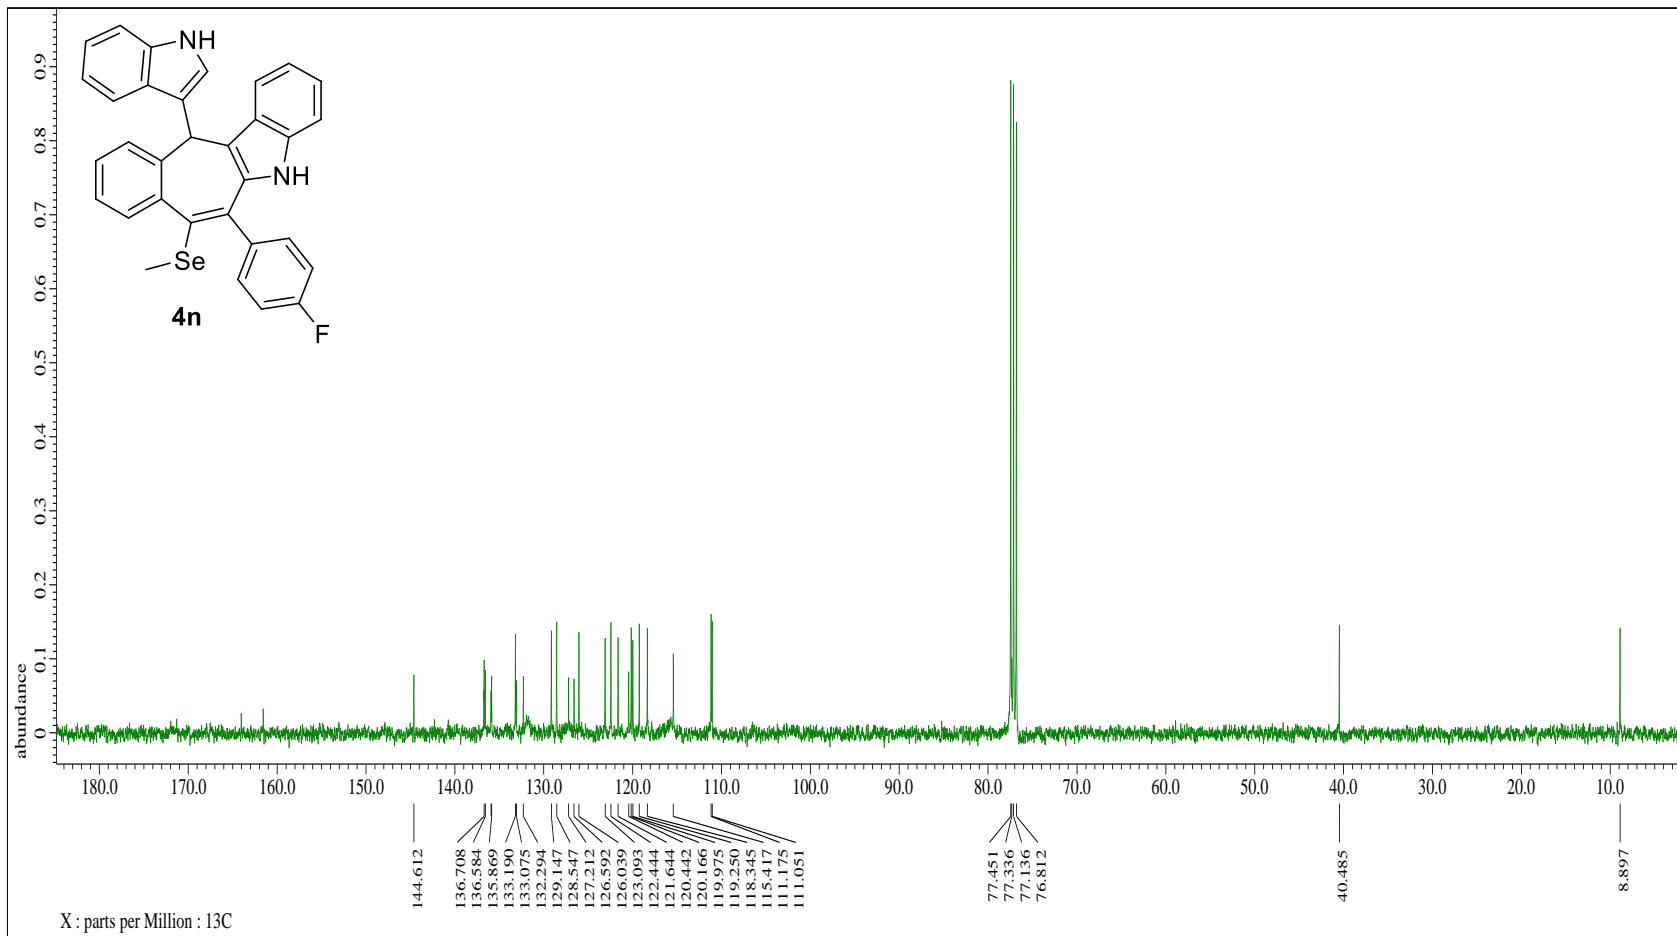

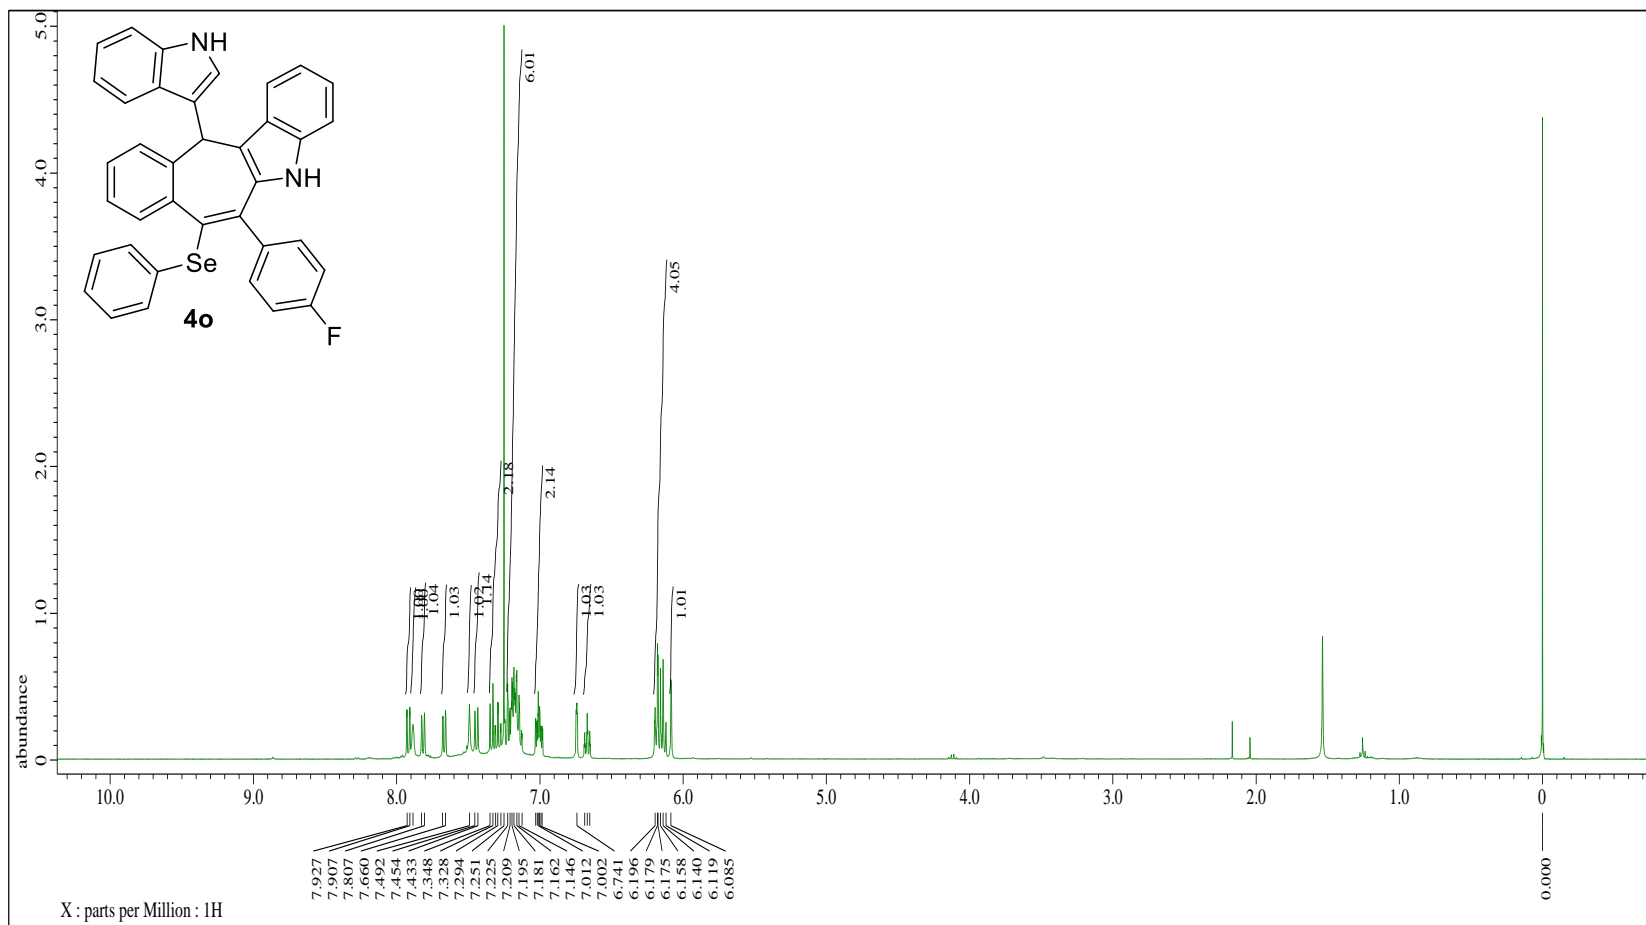

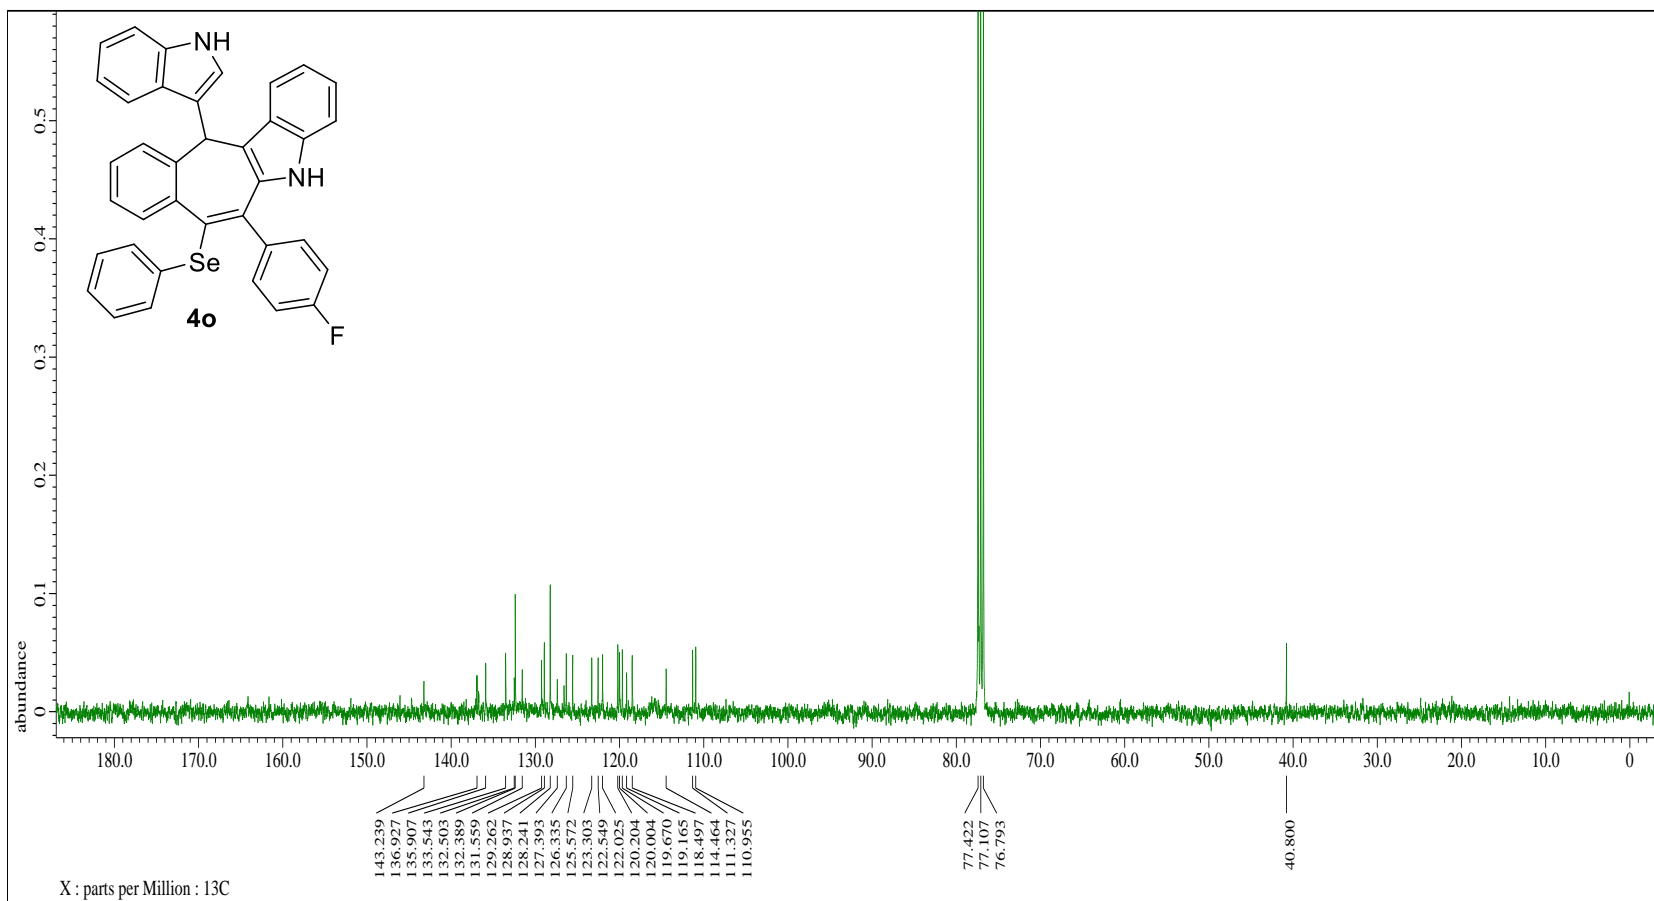

Supplement: d1ob00268f1.pdf [file d1ob00268f1.pdf]
